# Supplementary material for: Updating and further expanding GSK's solvent sustainability guide
Source: Royal Society of Chemistry journal article supplement (doi:10.1039/c6gc00611f), 2016-01-01
Supplement: c6gc00611f1.pdf [file c6gc00611f1.pdf]

Electronic Supplementary Information for:

## Updating and Expanding GSK's Solvent Sustainability Guide<sup>†</sup>

**Catherine M. Alder,<sup>a</sup> John D. Hayler,<sup>b</sup> Richard K. Henderson,<sup>c</sup> Anikó M. Redman,<sup>d</sup> Lena Shukla,<sup>a</sup>  
Leanna E. Shuster,<sup>\*e</sup> Helen F. Sneddon.<sup>\*a</sup>**

<sup>a</sup> *Green Chemistry, GSK, Medicines Research Centre, Gunnels Wood Road, Stevenage, Herts., UK, SG1 2NY.*

<sup>b</sup> *API Chemistry, GSK, Medicines Research Centre, Gunnels Wood Road, Stevenage, Herts., UK, SG1 2NY.*

<sup>c</sup> *Environmental Sustainability Centre of Excellence, GSK, Park Road, Ware, Herts., UK, SG12 0DP.*

<sup>d</sup> *Green Chemistry, GSK, 5 Moore Drive, Research Triangle Park, NC 27709, USA*

<sup>e</sup> *Green Chemistry, GSK, 1250 South Collegeville Road, Collegeville, PA 19426, USA.*

### Table of Contents:

Section 1: Selection of new solvents for assessment

Section 2: Details of GSK Solvent Sustainability Guide methodology

2.1: Assignment of Scores for Properties with a Continuum of Values

2.2: Normalisation of Category Scores

2.3: Incineration Score

2.4: Recycling Score

2.5: Biotreatment Score

2.6: VOC Emissions Score

2.7: Environment– Aqueous Impact Score

2.8: Environment – Air Impact Score

2.9: Exposure Potential Score

2.10: Health Hazard Score

2.11: Flammability & Explosion Score

2.12: Reactivity Score

Section 3: Chart showing category scoring assessments for full 154 solvent dataset

Section 4: Selected figures showing useful subsets of solvent guide information.

Section 5: Data Gap Analysis List

## Section 1: Selection of new solvents for assessment

There are a number of solvents which have garnered literature interest in recent years as potentially green options.<sup>1,2,3</sup> The ACS Green Chemistry Institute Pharmaceutical Roundtable (ACS GCIPR)<sup>4</sup> and the EU IMI:CHEM21<sup>5</sup> partnership also have ongoing efforts to produce comprehensive green chemistry solvent selection guides from a collaborative perspective. Any solvents included in the lists for evaluation from these groups which had not previously been part of the GSK solvent guide dataset were incorporated during this update.

The topic of bio-derived chemicals, some of which may serve as solvents, appears quite frequently in the green chemistry literature. Derived from citrus waste biomass, *p*-cymene and its precursor limonene have been shown to have utility as solvents for simple organic reactions.<sup>6</sup> Glycerol, included previously in the GSK guide, is produced as a waste product from biodiesel. Its derivatives glycerol diacetate and glycerol triacetate have been demonstrated as reaction solvents across a range of chemical transformations.<sup>7,8</sup> The bio-derived lactic acid has been proposed as an inexpensive and benign alternative to acetic acid and has been demonstrated to have utility as reaction media for multiple transformations.<sup>9</sup> Also derived from biomass and cited for their low toxicity are dimethyl isosorbide,<sup>10</sup>  $\gamma$ -valerolactone,<sup>11</sup> furfural,<sup>12</sup> and tetrahydrofurfuryl alcohol,<sup>13</sup> although not all of these have yet shown wide utility as reaction media in published literature.

Ethers often pose safety risks through their ability to form potentially explosive peroxide byproducts. 1,3-dioxolane is specifically noted to be less toxic than many traditional ether solvents.<sup>14</sup> Dimethoxymethane<sup>15</sup> and diethoxymethane have been mentioned as potentially green solvents based on their low peroxide formation potential, as well as the low water miscibility of diethoxyethane which could facilitate solvent recycling.<sup>16</sup> Diethoxymethane has also been demonstrated as reaction medium on multi-kilogram scale for a pharmaceutical development process.<sup>17</sup> Conclusive literature evidence of low peroxide formation tendency could only be found for diethoxymethane (DEM).<sup>18</sup> Therefore dimethoxymethane (DMM) continues to be scored in our dataset as having a significant peroxide formation rate, similar to commonly used ethers such as 1,4-dioxane and diethyl ether. In addition, the low boiling point and high vapour pressure of DMM raises concern with respect to volatile organic compound (VOC) emissions. Both DEM and DMM are reported to be poorly biodegradable and pose flammability risks due to low flash points.<sup>19</sup> These combined risks result in red evaluations for both of these solvents.

Carbonate solvents<sup>20</sup> have engendered interest within the green chemistry community due to their ready availability, low toxicity, and ease of biodegradation; therefore we expanded on the original dataset which included dimethyl, ethylene, and propylene carbonates to also include diethyl carbonate and butylene carbonate.<sup>21</sup>

Methanesulfonic acid has been mentioned in the literature as a green solvent based on high stability and easy biodegradability.<sup>22</sup> Several additional aliphatic alcohols and esters, both straight-chain and branched, are included in the updated assessments, since they offer EHS and green profiles similar to the alcohol and ester solvents which were recommended in the previous solvent guides. These include: amyl acetate, *t*-amyl alcohol, diethyl succinate, diisopropyl adipate, dimethyl succinate, 2-ethylhexylacetate, 1-heptanol, 1-hexanol, isoamyl acetate, methyl oleate, methyl propionate, 1-octanol, and 1-pentanol. Additional solvents (methyl formate, formic acid, 1,3-dimethyl-2-imidazolidinone, *N*-ethylpyrrolidone and tetramethylurea) were added because they have been suggested for evaluation by other groups (as were many of the aliphatic alcohols and esters), or because (2,4,6-collidine,) they were considered to be reasonably common solvents omitted from the 2011 version of the guide even if they were not necessarily expected to be assessed as green options.<sup>23</sup>

Green solvent research is a field that continues to grow and evolve. Recent literature reports suggest that 1,2,3-trimethoxypropane<sup>24</sup> shows utility as a reaction solvent for reduction of small molecules, although this glycerol-derived molecule is not currently commercially available from major vendors. Similarly, we have evaluated the green chemistry properties of dihydrolevoglucosenone, a dipolar aprotic solvent developed by Circa group under the name Cyrene<sup>TM</sup>, although not yet distributed through major suppliers.<sup>25</sup> Given the limited data available for both 1,2,3-trimethoxypropane and dihydrolevoglucosenone, a number of assumptions were required based on chemicals of similar structure. With this combination of experimental and approximated data, the scores for 1,2,3-trimethoxypropane are quite low for human health concerns, while dihydrolevoglucosenone has low to moderate scoring in categories for waste treatment and human health.

A number of other solvents were considered for evaluation, including ones which are manufactured at high volume and frequently employed in other industrial sectors. The scope of this guide, however, is intended to focus on solvents with utility for organic synthesis, therefore solvents for which no such use could be documented were not included.<sup>26</sup>

Other classes of solvents such as ionic liquids,<sup>27</sup> fluorinated solvents, supercritical fluids, and polymeric solvents are frequently mentioned in green chemistry references.<sup>2</sup> However, these solvent types are deemed to be beyond the aim of this current work.

## Section 2: Details of GSK Solvent Sustainability Guide Methodology

### 2.1 Assignment of Scores for Properties with a Continuum of Values

Data scores assessed within categories of this guide typically range in value from 1 to 4. For some scores, the correlation of data to discrete score values is done on known risks associated with certain property thresholds. For others, the scoring is a continuum based on the range of known values within the dataset. This process is exemplified for the enthalpy of combustion score, found within the incineration category. The full set of data for the score in question is gathered and sorted in numerical order. With the data thus sorted, a column chart is created to show the range of values:

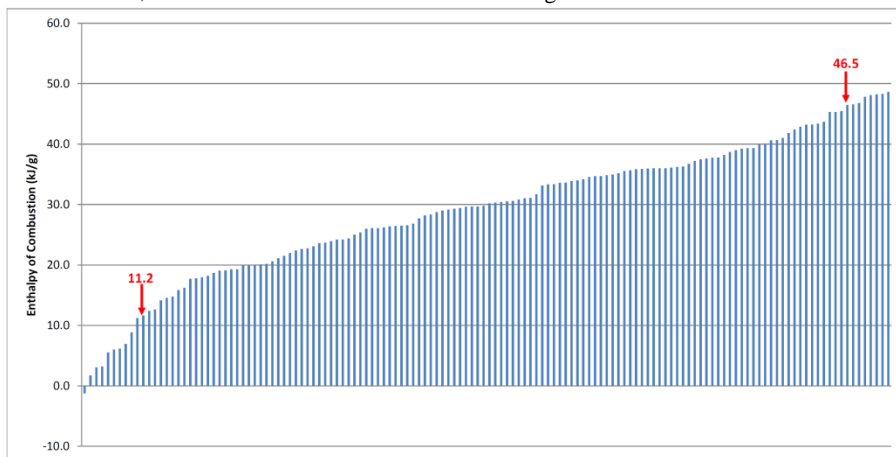

**Figure 1: Plot showing range of enthalpy of combustion data and assignment of end limit values**

The chart is examined and points are chosen where the ends of the data range show significant inflection from the bulk of the data, as indicated above by the data points with red arrows. These data values are assigned to score values of 1 and 4, which are plotted, and the corresponding equation calculated (Figure 2). This equation is used to calculate score values for the full dataset.

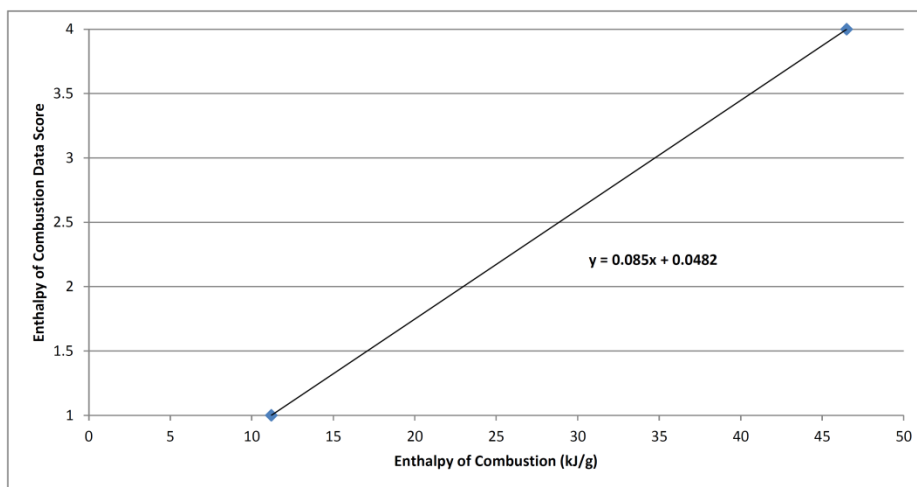

**Figure 2: Plot used to determine equation for calculation of enthalpy of combustion data score**

This approach is employed for the following data scores:

| Category                  | Data Score                             | Data Value for Score = 1    | Data Value for Score = 4    |
|---------------------------|----------------------------------------|-----------------------------|-----------------------------|
| Incineration              | Enthalpy of Combustion                 | 11.2 kJ/g                   | 46.5 kJ/g                   |
| Biotreatment              | Theoretical Oxygen Demand (ThOD)       | 3.17 NO <sub>3</sub> eq./kg | 1.22 NO <sub>3</sub> eq./kg |
| Biotreatment              | Vapour Pressure                        | 325 mm Hg                   | 0.21 mm Hg                  |
| Environmental Impact: Air | Vapour Pressure: Odour Threshold Ratio | 22,600 mm Hg/ppm            | 0.003 mm Hg/ppm             |

|                    |                     |         |      |
|--------------------|---------------------|---------|------|
| Exposure Potential | Vapour Hazard Ratio | 518,400 | 8.03 |
|--------------------|---------------------|---------|------|

**Table 1: List of data points for which scores are determined by method shown in Figure 1 and Figure 2.**

## 2.2 Normalisation of Category Scores

For each category, scores are assigned on a scale from 1 to 10, with the intent that the solvent rated the least green in a category has score equal to 1, and that rated the most green has score equal to 10. As shown in Table 2-Table 5, multiple data points are scored within each category. With the exception of the health hazard score, the geometric mean of these data scores is then taken to give a preliminary category score. With each of these data scores ranging from 1 to 4, the preliminary category score would in theory have the same range. For some categories, however, the full range from 1 to 4 is not covered. Therefore, in order to translate these scores to a full 1 to 10 span, the following equation is employed:

$$Score = \left( \frac{Score_{calc} - Min\ Score}{Max\ Score - Min\ Score} \times 9 \right) + 1$$

where  $Score_{calc}$  is the geometric mean of data scores as calculated for an individual solvent, and Min Score and Max Score are the minimum and maximum values of a particular  $Score_{calc}$  across the full dataset.

| Incineration           | Recycling           | Biotreatment              | VOC Emissions   |
|------------------------|---------------------|---------------------------|-----------------|
| Water solubility       | Boiling point       | Nitrogen content          | Boiling point   |
| Emissions to air       | Boiling point range | Theoretical oxygen demand | Vapour pressure |
| Enthalpy of combustion | Ease of drying      | Vapour pressure           |                 |
|                        | Water solubility    | Halogen content           |                 |
|                        | Reactivity          | Water solubility          |                 |
|                        | Flammability        |                           |                 |

**Table 2: Summary of data points used in calculation of waste category scores**

| Environment: Aqueous                                                                                            | Environment: Air                              |
|-----------------------------------------------------------------------------------------------------------------|-----------------------------------------------|
| Acute tox LC <sub>50</sub> /IC <sub>50</sub> values for aquatic species ( <i>i.e.</i> fish, daphnia, and algae) | Photochemical ozone creation potential (POCP) |
| Partition coefficient (Log K <sub>OW</sub> )                                                                    | Odour threshold                               |
| Biodegradation                                                                                                  | Vapour pressure                               |

**Table 3: Summary of data points used in calculation of environment category scores**

| Health Hazard      | Exposure Potential  |
|--------------------|---------------------|
| GHS Hazard Phrases | Vapour hazard ratio |
| OEL values         |                     |

**Table 4: Summary of data points used in calculation of health category scores**

| Flammability & Explosion  | Reactivity                      |
|---------------------------|---------------------------------|
| Electrical conductivity   | NFPA Reactivity Rating          |
| Boiling point             | Peroxide formation tendency     |
| Vapour pressure           | Self-reactive hazard assessment |
| Auto ignition temperature | Acidity                         |
| Flash point               | Special Hazards                 |

**Table 5: Summary of data points used in calculation of safety category scores**

## 2.3 Incineration Score

Aqueous solubility is rated by assigning the following discrete values to the integral scores 1-4.

- Score 4: Aqueous solubility = 1 g/L
- Score 3: Aqueous solubility = 5 g/L
- Score 2: Aqueous solubility = 50 g/L
- Score 1: Aqueous solubility ≥ 250 g/L

The solubility of the solvent in water is commonly available in the literature and is used as a surrogate for the less available solubility of water in the solvent.

With these assignments made, a linear graph is obtained by plotting score against  $\log(\text{solubility})$  to give a plot of:

$$\text{Aqueous Solubility Score} = -1.22 \times \log(\text{solubility}) + 3.96$$

where solubility is measured in g/L. This formula is used to convert reported aqueous solubility data to scores between 1 and 4, for  $1 \text{ g/L} < \text{solubility} < 250 \text{ g/L}$ . Any solubility values outside of this range are given the boundary scores of 1 or 4.

The emissions to air score is based on an ordinal ranking as follows:

- Score 4: If no N, S, or specific unwanted by-products
- Score 2: If solvent contains N or S, therefore  $\text{NO}_x$  or  $\text{SO}_x$  can be emitted
- Score 1: If specific unwanted by-products are emitted, specifically: dioxins, phosgene, HCl, or HF

Enthalpy of combustion ( $\Delta H_c^\circ$ ) data are sourced at STP conditions. Where published sources disagree, the minimum reported value is utilised. As described in Section 2.1, the range of this data is used to determine the formula:

$$\text{Enthalpy of Combustion Score} = 0.085 \times \Delta H_c^\circ + 0.048$$

which is then used to convert reported enthalpies of combustion to values between 1 and 4. In instances where enthalpy of combustion values cannot be sourced, the enthalpy combustion score is set by default to 2.0.

A preliminary incineration score is calculated as the geometric mean of the water solubility, emissions, and enthalpy of combustion scores, followed by normalization to provide the incineration category score.

## 2.4 Recycling Score

A maximum score of 4 is assigned for a boiling point of  $\leq 50 \text{ }^\circ\text{C}$ . A minimum score is assigned of 1 for a boiling point  $\geq 200 \text{ }^\circ\text{C}$ . Plotting a graph of boiling point against score gives an equation of:

$$\text{Boiling Point Score} = -0.02 \times \text{boiling point} + 5.0$$

for  $50 \text{ }^\circ\text{C} < \text{boiling point} < 200 \text{ }^\circ\text{C}$ .

For boiling point range, a list of 40 commonly used solvents, as determined through consultation with the GSK manufacturing organisation, is consulted. Given the reasonable likelihood of any given solvent appearing together in an organic solvent waste stream with one or more of these common solvents, any similarities in boiling points would tend to significantly increase the difficulty of solvent waste recycling. The boiling point of each solvent in the guide was compared against those of the 40 common solvents. A maximum score of 4 for boiling point range is assigned if none of the 40 common solvents has a boiling point within  $10 \text{ }^\circ\text{C}$  of that of the solvent in question. A minimum score of 1 is assigned if 10 or more solvents are found with a boiling point within  $10 \text{ }^\circ\text{C}$  of the solvent concerned. These data points are plotted to determine the formula:

$$\text{Boiling Point Range Score} = -0.30 \times \text{number of solvents} + 4.0$$

for  $0 < \text{number of solvents} \leq 10$ .

Ease of drying is rated between 1 and 4 as follows:

- Score 4: Solvent known to form an azeotrope with water.
- Score 3: Not known whether the solvent forms an azeotrope with water and boiling point is not similar to that of water.
- Score 1: Difficult to dry, since boiling point is within  $10 \text{ }^\circ\text{C}$  to that of water or does not form an azeotrope with water.

Azeotrope formation with co-solvents other than water is not considered. The previous methodology penalised solvents for being known to form azeotropes with other solvents within the guide, however similar logic to that described for close boiling solvents applies here in that such data simply is not established for numerous potential combinations of two or more of the 154 solvents within the dataset.

Flammability and explosivity is rated between 1 and 4 using a normalised value (*i.e.* a ranked normalised score taking into account: boiling point, flash point, autoignition temperature, conductivity and vapour pressure, as described further in Section 1.11.<sup>28</sup>)

Reactivity is rated between 1 and 4 in a similar manner to flammability and explosivity, normalizing scores described further in Section 2.12 which assess peroxide formation, potential for self-reaction, National Fire Protection Association (NFPA) Reactivity

Ratings, acidity/basicity, and any special hazards.

Aqueous solubility is rated between 1 and 4 as described previously under the assessment of incineration score.

The recycle category score is first calculated as:

$$\text{Recycle Score} = \sqrt[7]{BP^{1.5} \times BPR \times EoD \times WS \times R \times F}$$

where BP = boiling point score, BPR = boiling point range score, EoD = ease of drying score, WS = water solubility score, R = reactivity score, and F = flammability score.

This is essentially an adjusted variant of the geometric mean approach used for other scores which applies a higher weighting to boiling point, acknowledging the disproportionate impact that this factor has on the ease of recycling. This score, with a theoretical minimum of 1 and a theoretical maximum of 4 is then normalised to give a score between 1 and 10.

## 2.5 Biotreatment Score

The nitrogen content in solvent score is assigned as 4 if no nitrogen is present and as 2 if nitrogen is present.

The theoretical oxygen demand (ThOD) per kilogram of solvent is calculated as:

$$\text{ThOD} = \frac{\# \text{ of O atoms}}{\text{MW of solvent}} \times 16$$

where 16 represents the molecular weight of oxygen and the number of oxygen atoms required to oxidise one molecule of solvent is calculated from the solvent's molecular formula, based on the values given in Table 6.

| # of atoms of [O] required per atom | Atom | Product                      |
|-------------------------------------|------|------------------------------|
| 2.0                                 | C    | CO <sub>2</sub>              |
| 0.5                                 | H    | H <sub>2</sub> O             |
| 2.5                                 | N    | NO <sub>x</sub> mixture      |
| 3.0                                 | S    | SO <sub>3</sub> <sup>-</sup> |
| -1.0                                | O    | O <sub>2</sub>               |
| 0.5                                 | Cl   | Cl <sub>2</sub>              |
| 0.5                                 | F    | F <sub>2</sub>               |

**Table 6: Assumed fates of elements for calculation of theoretical oxygen demand**

Data limits are assigned (see Table 1) and plotted to determine the equation:  $\text{Score} = -1.54 \times \text{ThOD} + 5.88$ , and this is used to determine a theoretical oxygen demand score.

A score assessing treatability in aeration tanks is calculated as:

$$\text{Treatability in Aeration Tanks Score} = \sqrt[2]{\text{ThOD Score} \times \text{Nitrogen Content Score}}$$

Vapour pressure is used as an indicator of volatility. Data limits for vapour pressure are assigned and plotted to determine the equation:

$$\text{Volatility Score} = -0.94 \times \text{Vapour Pressure} + 3.36$$

for  $0.20 \text{ mm Hg} \leq \text{vapour pressure} \leq 400 \text{ mm Hg}$  and this is used to determine a volatility score.

The halogenated score is assigned as follows:

- Score 4: no Cl, F present
- Score 2: F present or only 1 Cl atom present
- Score 1: Cl atoms  $\geq 2$

A score assessing the possibility of releases to air is then calculated as:

$$\text{Release to Air Score} = \sqrt[2]{\text{Volatility Score} \times \text{Halogenated Score}}$$

The values described in the incineration score for water solubility are used as a potential aqueous burden score for biotreatment. The solubility of the solvent in water is the appropriate measure for this score.

The biotreatment score is first calculated as:

$$\text{Biotreatment Score} = \sqrt[3]{\text{TiAT} \times \text{RtA} \times \text{PAB}}$$

where TiAT = treatability in aeration tanks score, RtA = release to air score and PAB = potential aqueous burden score. This score is then normalised to give the biotreatment category score.

## 2.6 VOC Emissions Score

The vapour pressure score previously described in the biotreatment score section is used.

It should be noted that this data relates to pure solvent at 20 °C and atmospheric pressure, and does not relate to mixtures.

Data limits for boiling point are assigned such that a boiling point of  $\leq 40^\circ\text{C}$  correlates to a score of 1 and  $\geq 110^\circ\text{C}$  correlates to a score of 4. These points are plotted to determine the equation:

$$\text{Boiling Point Score} = 0.043 \times bp - 0.71$$

where bp = boiling point (in °C). This equation is used to determine boiling point data scores for  $40^\circ\text{C} < bp < 110^\circ\text{C}$ .

The VOC Emissions score is calculated as:

$$\text{VOC Score} = \sqrt{\text{VP} \times \text{BP}}$$

where VP = vapour pressure score and BP = boiling point score, and is then normalised to give the VOC emissions category score.

## 2.7 Environment– Air Impact Score

A score is assigned to photochemical ozone creation potential (POCP) as follows, where POCP is measured in 100 kg of ethane equivalents:

- Score 4:  $\text{POCP} \leq 20$
- Score 3:  $20 > \text{POCP} \leq 40$
- Score 2:  $40 > \text{POCP} \leq 60$
- Score 1:  $> 60$

Where no data is available, the dataset is examined to see if a suitable nearest neighbour value can be utilised. If not, a default value of 2 for POCP is assigned.

Solvent odour is assessed via the ratio of vapour pressure to odour threshold, with odour threshold in units of ppm. Data limits are assigned (see Table 1) to give the equation:

$$\text{Odour Score} = -0.44 \times \log \frac{P_{\text{vap}}}{\text{OT}} + 2.90$$

where OT = odour threshold (in units of ppm).

If a solvent is assigned GHS hazard phrase H420 (harms public health and the environment by destroying ozone in the upper atmosphere), indicating that it is destructive to ozone in the upper atmosphere, an Environmental Impact-Air score of 1 is automatically assigned.

For all other solvents, the Environment Impact-Air score is calculated as:

$$\text{Environmental Impact – Air Score} = \sqrt{\text{POCP Score} \times \text{Odour Score}}$$

which is then normalised to give the Environmental Impact-Air category score.

## 2.8 Environment– Aquatic Impact Score

### Acute Toxicity

The literature was searched for LC<sub>50</sub> values against various aquatic species (including minnow, other fish, algae and daphnia). A maximum acute toxicity score of 4 is assigned to a worst case LC<sub>50</sub> of 1000 mg/L, and a minimum score of 1.0 is assigned for a worst case LC<sub>50</sub> of 1 mg/L. For all solvents except  $\gamma$ -valerolactone, such data was available on at least one aquatic species. In this single case, an estimate is made based on nearest neighbour. In addition, if the GHS hazard phrases for any solvent include H400 (very toxic to aquatic life), the acute toxicity score is set automatically to 1.0 and for H401 (toxic to aquatic life), this score is set automatically to 1.5. A GHS phrase of H402 (harmful to aquatic life) would correlate to an acute toxicity score of 2.0, although no solvents in the current data set are listed with this risk phrase.

For those solvents not listed with one of these GHS H&P phrases, plotting a graph of score against log (worst case LC<sub>50</sub>) gives the following equation for 1 mg/L < LC<sub>50</sub> < 1000 mg/L:

$$\text{Acute Toxicity Score} = \log(\text{worst case LC}_{50}) + 1$$

### Chronic Toxicity

The partition coefficient (log K<sub>ow</sub>) is used to indicate the lipophilicity of a solvent, which in turn correlates to its likelihood of posing chronic toxicity issues in the aquatic environment. A log K<sub>OW</sub>  $\geq$  4.0 is associated with a high risk of bioaccumulation,<sup>29</sup> therefore this value is assigned to a chronic toxicity score of 1.0 and a low log K<sub>OW</sub> of 2.5 is assigned to a score of 4.0. These points are plotted to determine the equation:

$$\log K_{OW} \text{ Score} = -2 \times \log K_{OW} + 9$$

Also considered in the chronic toxicity score is whether any of H410 (very toxic to aquatic life with long-lasting effects), H411 (toxic to aquatic life with long-lasting effects), H412 (harmful to aquatic life with long-lasting effects), or H413 (may cause long-lasting harmful effects to aquatic life) is included in a solvent's GHS hazard phrase listing. The relationship between these hazard phrases and the chronic toxicity score has been set as follows:

| GHS Hazard Phrase     | Chronic Toxicity Score    |
|-----------------------|---------------------------|
| H410                  | 1.0                       |
| H411                  | 1.33                      |
| H412                  | 1.66                      |
| H413                  | 2.0                       |
| None of above phrases | log K <sub>ow</sub> Score |

**Table 7: Environmental GHS Hazard Phrase correlations to Chronic Toxicity Score**

The chronic toxicity score is determined as the worst of either the K<sub>ow</sub> score or the scores shown in Table 7.

A score is assigned to Biodegradation as follows:

- Score 4: Readily biodegradable (biodegradability > 60%) or biochemical oxygen demand (BOD) > 50.
- Score 3: BOD = 20-30 or stated to be inherently biodegradable.
- Score 2: Slow to very slow rate of biodegradation.
- Score 1: Recalcitrant, or data suggests a serious biodegradation issue.

Where no biodegradation data is available, a score is assigned based on nearest neighbour.

The Environmental Impact–Aqueous score is first calculated as:

$$\text{Environmental Impact – Aqueous Score} = \sqrt[3]{AT \times CT \times BD}$$

where AT = acute toxicity score, CT = chronic toxicity score, and BD = biodegradability score, which is then normalised to give the Environmental Impact-Aqueous category score.

## 2.9 Exposure Potential Score:

The Vapour Hazard Ratio (VHR) is calculated as:

$$VHR = \frac{SC}{OEL}$$



Where:

- Saturation Concentration (SC) is a measure of the concentration (in ppm) of solvent vapour in the gas phase. Saturation concentration is calculated by converting vapour pressure values (in mm Hg) to ppm, via the formula:

$$SC = VP \times \frac{1 \times 10^6 \text{ ppm}}{760 \text{ mm Hg}}$$

- Occupational Exposure Limit (OEL) is the minimum value of regulated occupational exposure levels found by comparing data from multiple sources.<sup>30</sup>

If no data for OEL can be found, the solvent is assigned a default value of 2.5 ppm, chosen with an understanding that a lack of data does not necessarily correlate to lack of risk.<sup>31</sup>

Data limits are assigned and plotted to determine the equation:

$$VHR \text{ Score} = -0.62 \times \log(VHR) + 4.56$$

and this is used to determine a vapour hazard ratio score. This score is then normalised to give the exposure potential category score.

## 2.10 Health Hazard Score:

The main drivers for the health hazard score are regulatory OEL values and GHS H&P phrases. For each solvent, the process described in Figure 3 is followed to determine the appropriate GHS phrases to utilise.<sup>32</sup> With the GHS phrases thus determined, the procedure detailed in Figure 4 is used to assign the health hazard score. In cases where Figure 3 states that OEL value should be employed to set the health hazard score, this assignment is made using the correlations in Table 8.

For those solvents which are not harmonized via GHS and also do not have an OEL value assigned by one of the major regulatory agencies consulted in this work, our team examined the available data<sup>33</sup> and determined on an individual solvent basis whether sufficient toxicological testing results are available to support that the GHS phrases listed on the vendor MSDS are comprehensive. The annual level of production for each solvent is here included (Table 9), because REACH guidelines require more stringent toxicological testing for all chemicals produced above 1,000 tons per year.<sup>34</sup> If the annual production falls below this level, a precautionary health hazard score of 4 is applied.

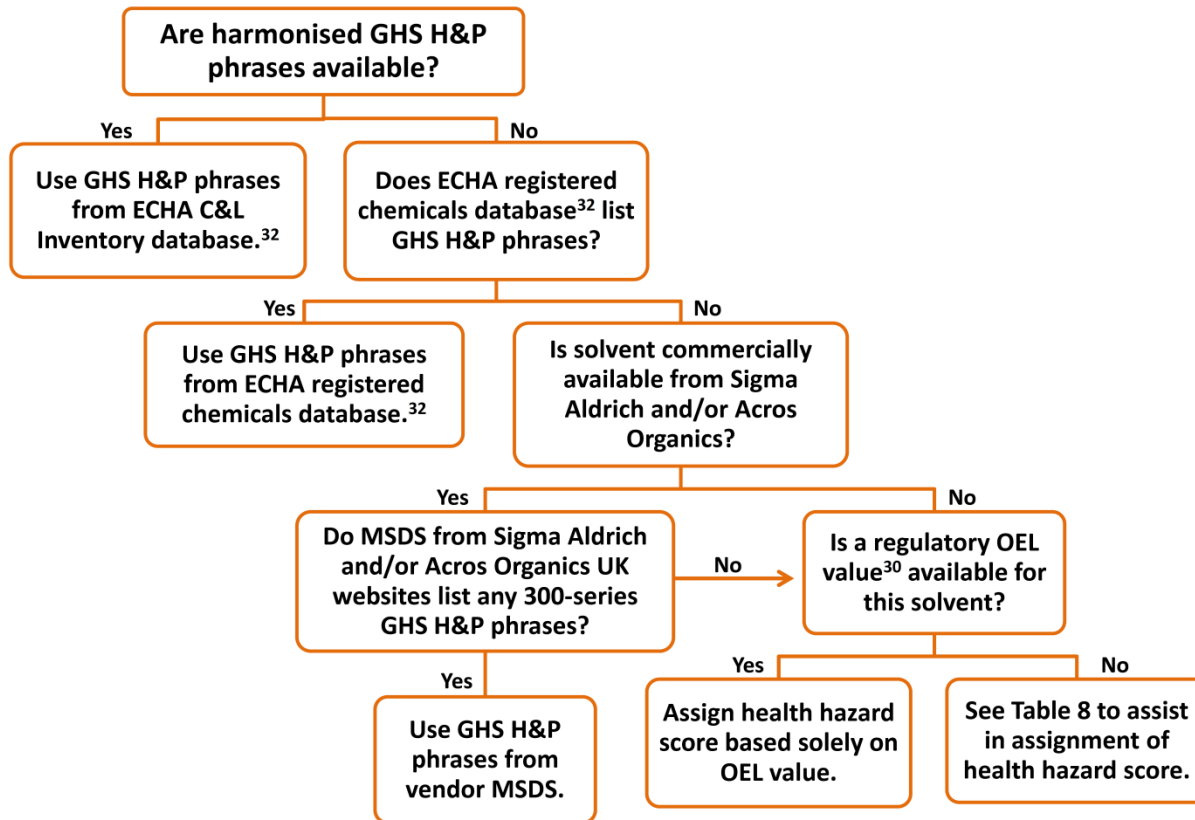

Figure 3: Decision tree detailing process for determination of GHS phrases for a given solvent.

| OEL (ppm) | Health Hazard Score |
|-----------|---------------------|
| < 0.5     | 1                   |
| ≤ 5       | 4                   |
| ≤ 50      | 7                   |
| > 50      | 10                  |

Table 8: OEL value correlations to Health Hazard Score

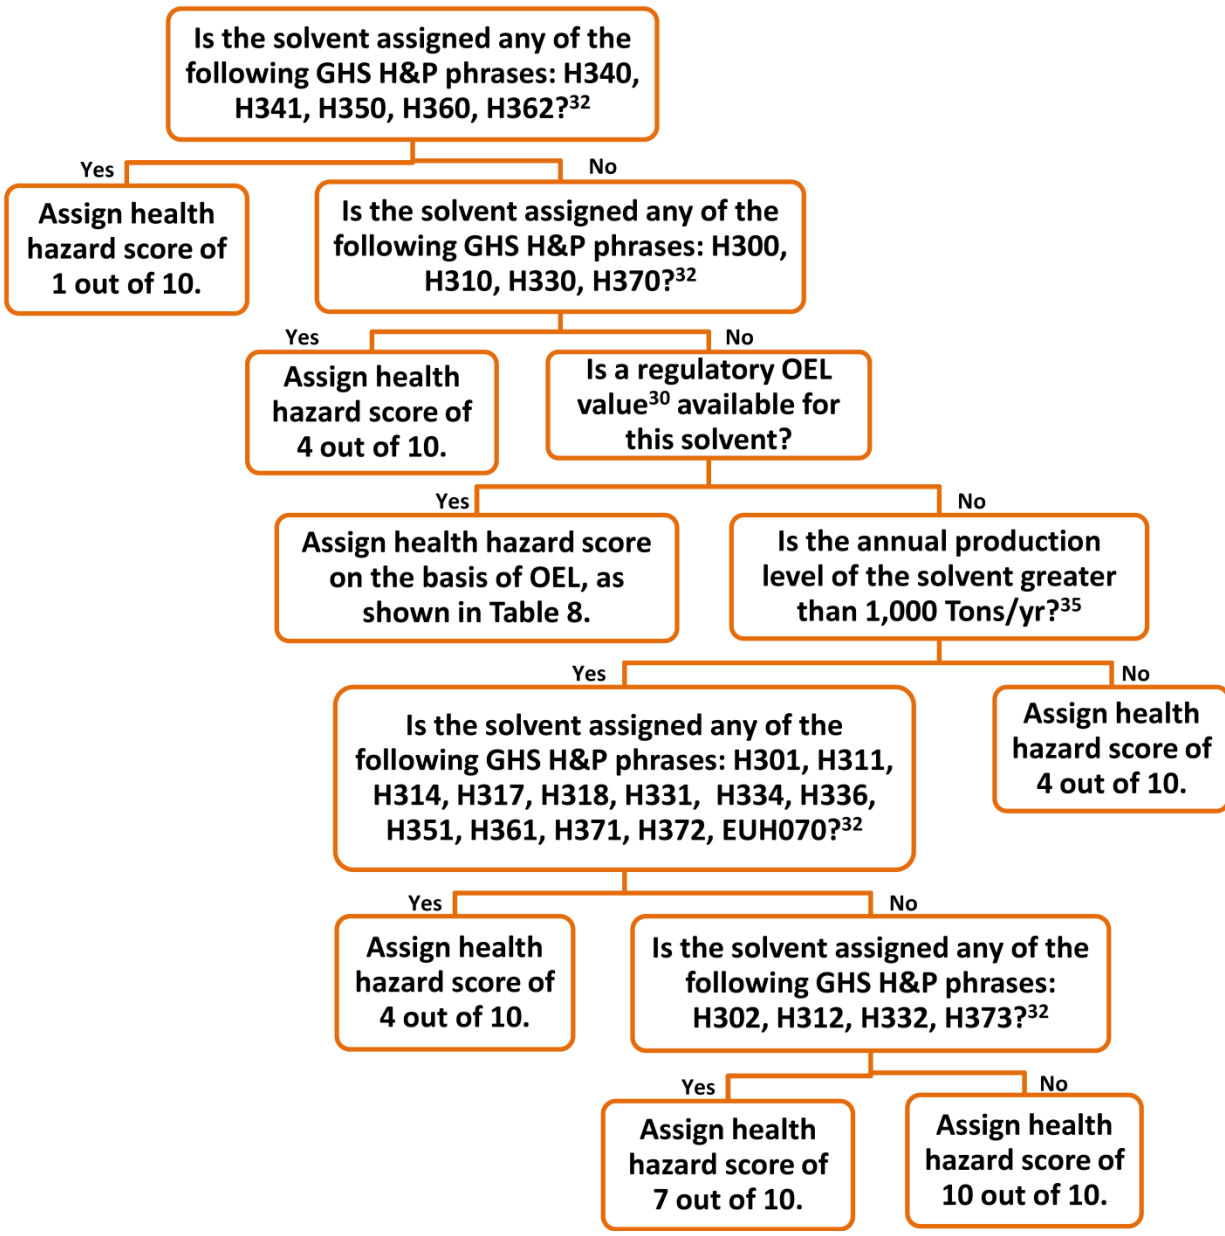

Figure 4: Decision tree showing process for assigning health hazard score.

| Solvent                        | GHS Phrases                  | GHS Phrases Source             | Annual Production Level (tons/yr) <sup>35</sup>           | Precautionary 4 out of 10 Score?                  |
|--------------------------------|------------------------------|--------------------------------|-----------------------------------------------------------|---------------------------------------------------|
| Butylene carbonate             | No MSDS available            |                                | Unknown                                                   | Yes                                               |
| Cyclopentyl methyl ether       | H225, H302, H315, H319, H412 | ECHA                           | 10-100                                                    | Yes                                               |
| <i>p</i> -Cymene               | H226, H315, H319, H304, H335 | ECHA                           | Classified in US as High Production Volume (HPV) chemical | No – approved by FDA for use in human foodstuffs. |
| Diethoxymethane                | H225                         | ECHA                           | 100-1,000                                                 | Yes                                               |
| Diethyl carbonate              | H226                         | ECHA                           | 100-1,000                                                 | Yes                                               |
| Diethyl succinate              | H227                         | Sigma Aldrich                  | Unknown                                                   | Yes                                               |
| Dihydrolevoglucosenone         | H319                         | Circa Group                    | Unknown                                                   | Yes                                               |
| Diisopropyl adipate            | H315                         | Sigma Aldrich                  | 100-1,000                                                 | Yes                                               |
| 1,3-Dimethyl-2-imidazolidinone | H302, H318, H361, H373       | ECHA                           | 10-100                                                    | Yes                                               |
| Dimethyl isosorbide            | No GHS phrases listed        |                                | Unknown                                                   | Yes                                               |
| Ethoxybenzene                  | H226                         | ECHA                           | 0-10                                                      | Yes                                               |
| Ethylene carbonate             | H302, H319, H373             | ECHA                           | 1,000+                                                    | No                                                |
| 2-Ethylhexyl acetate           | H315                         | ECHA                           | 1,000+                                                    | No                                                |
| Fluorobenzene                  | H225, H318, H401, H411       | ECHA                           | Unknown                                                   | Yes                                               |
| Glycerol triacetate            | No GHS phrases listed        |                                | 10,000-100,000                                            | No                                                |
| Glycerol diacetate             | H227, H315, H319, H335, H412 | Sigma Aldrich                  | 1,000-10,000                                              | No                                                |
| 1-Heptanol                     | H319                         | ECHA                           | 1,000-10,000                                              | No                                                |
| 2-Methyltetrahydrofuran        | H225, H302, H315, H318       | ECHA                           | 100-1,000                                                 | Yes                                               |
| <i>n</i> -Octyl acetate        | No GHS phrases listed        |                                | Unknown                                                   | Yes                                               |
| Perfluorocyclic ether          | No MSDS available            |                                | Unknown                                                   | Yes                                               |
| Perfluorocyclohexane           | No MSDS available            |                                | Unknown                                                   | Yes                                               |
| Perfluorohexane                | H315, H319, H335, H413       | Sigma Aldrich & Acros Organics | Unknown                                                   | Yes                                               |
| Perfluorotoluene               | H225, H302, H315, H319, H331 | Sigma Aldrich                  | Unknown                                                   | Yes                                               |
| 1,3-Propanediol                | None listed                  |                                | 1,000-10,000                                              | No                                                |
| Tetramethylurea                | H227, H302, H360             | Sigma Aldrich                  | Unknown                                                   | No –GHS phrase H360 correlates to a score of 1.   |
| 1,2,3-Trimethoxypropane        | No MSDS available            |                                | Unknown                                                   | Yes                                               |
| $\gamma$ -Valerolactone        | H227                         | Sigma Aldrich                  | Unknown                                                   | Yes                                               |

Table 9: Health data analysis for non-harmonized solvents which lack OEL values.

## 2.11 Flammability & Explosivity Score:

The boiling point score is assigned as described previously in the VOC Emissions section 2.6.

The flash point score is assigned as follows:<sup>36</sup>

- Score 4: Flash point > 50 °C
- Score 3: 20 °C ≤ Flash point ≤ 50 °C
- Score 2: 0 °C ≤ Flash point < 20 °C
- Score 1: Flash point < 0 °C

The Autoignition Temperature score is assigned as follows:

- Score 4: > 300 °C
- Score 3: 135-300 °C
- Score 2: 85-135 °C
- Score 1: < 85 °C

The Conductivity score is assigned based on electrical conductivity or resistivity data as follows:

- Score 4: > 10,000 pS/m (Resistivity < 1x10<sup>9</sup> Ω m)
- Score 3: 50 < Conductivity ≤ 10,000 pS/m (Resistivity: 1 x10<sup>9</sup> - 2x10<sup>10</sup> Ω m)
- Score 2: 1 < Conductivity ≤ 50 pS/m (Resistivity: 2x10<sup>10</sup> - 1x10<sup>12</sup> Ω m)
- Score 1: ≤ 1 pS/m (Resistivity >1x10<sup>12</sup> Ω m)

For solvents without conductivity data, a solvent is assigned a High, Medium, Low or Very Low ranking based on its class as follows:

| Solvent Class   | Default Value                                                                                                                               |
|-----------------|---------------------------------------------------------------------------------------------------------------------------------------------|
| Alcohol         | High                                                                                                                                        |
| Aromatic        | Very Low                                                                                                                                    |
| Carbonate       | High                                                                                                                                        |
| Dipolar Aprotic | High                                                                                                                                        |
| Ester           | Medium (The data shows a mixture of high and medium. Applying a precautionary principle, the more stringent grouping is therefore applied.) |
| Hydrocarbon     | Very Low                                                                                                                                    |
| Ketone          | High                                                                                                                                        |

**Table 10: Solvent class-based default values for electrical conductivity**

For ethers and halogenated solvents the experimental data showed no clear trend and manual assignments are made on a nearest neighbour basis. The vapour pressure score is assigned as previously described under Biotreatment in section 2.5.

The flammability and explosion potential score is first calculated as the following geometric mean:

$$\text{Flammability \& Explosion Potential Score} = \sqrt[5]{BP \times FP \times AIT \times EC \times VP}$$

where BP = boiling point score, FP = flash point score, AIT = autoignition temperature score, EC = electrical conductivity score, and VP = vapour pressure score. This geometric mean is then normalised to give the flammability and explosion potential category score.

## 2.12 Reactivity Score:

The peroxide formation score is assigned as follows:

- Score 4: No evidence of peroxide formation.
- Score 3: Peroxide formation known under certain conditions.
- Score 2: No data available, yet chemical structure suggests the possibility of peroxide formation.
- Score 1: Peroxide formation known to occur readily.

The potential for self-reaction score is assigned as follows:

- Score 4: None known
- Score 3: Some self-reaction known
- Score 2: Strong tendency for self-reaction
- Score 1: Very strong tendency for self-reaction

The NFPA score for the GSK guide is assigned based on NFPA reactivity hazard ratings, one of three NFPA rating values typically found on the MSDS for chemicals sold in the United States. For the two non-commercially available solvents (dihydrolevoglucosenone and 1,2,3-trimethoxypropane), a default NFPA Guide Score of 4 is assigned, as there are no known reasons to expect either of these chemicals to exhibit the types of reactivity hazards covered by these ratings.

| NFPA Score for GSK Guide | NFPA Reactivity Hazard Rating | Description of Rating Class                                                                                                                          |
|--------------------------|-------------------------------|------------------------------------------------------------------------------------------------------------------------------------------------------|
| 4                        | 0                             | Stable when exposed to heat, pressure or water.                                                                                                      |
| 3                        | 1-2                           | May become unstable at elevated temperatures and pressures or when mixed with water.                                                                 |
| 2                        | 3                             | Violent chemical changes possible at normal or elevated temperatures and pressures. Potentially violent or explosive reaction when mixed with water. |
| 1                        | 4                             | Readily capable of detonation or explosion at normal temperatures and pressures.                                                                     |

**Table 11: Guidelines for assignment of NFPA Reactivity Hazard Score**

The acidity/basicity score is assigned as follows:

- Score 4: No acidity
- Score 3: Mild acid/base
- Score 2: Moderate acid/base
- Score 1: Strong acid/base

The special hazards score is assigned as follows:

- Score 4: No special hazard
- Score 2: Risk of explosion on industrial process scale
- Score 1: Significant issues are known, *e.g.* pyrophoricity, shock sensitivity, severe known explosion risk, or demonstrating extreme stench

The reactivity potential score is first calculated as:

$$\text{Reactivity Potential Score} = \sqrt[5]{PF \times SR \times NFPA \times SH \times A}$$

where PF = peroxide formation score, SR = self reactive hazard score, NFPA = NFPA score, SH = special hazard score, and A = acidity score. This score is then normalised to give the Reactivity category score.

Section 3: Chart showing scoring outcomes for full 154 solvent dataset, sorted by chemical class

| Classification       | Solvent Name                | CAS Number          | Composite Colour | Boiling Point (°C) | Inchineration | Recycling | Bioreatment | VOC Emissions | Aquatic Impact | Air Impact | Health Hazard | Exposure potential | Flammability & Explosion | Reactivity & Stability |    |
|----------------------|-----------------------------|---------------------|------------------|--------------------|---------------|-----------|-------------|---------------|----------------|------------|---------------|--------------------|--------------------------|------------------------|----|
|                      | Water                       | 7732-18-5           |                  | 100                | 4             | 2         | 4           | 6             | 10             | 8          | 10            | 9                  | 8                        | 10                     |    |
|                      | Lactic acid                 | 50-21-5             |                  | 122                | 3             | 6         | 5           | 10            | 9              | 6          | 4             | 9                  | 10                       | 8                      |    |
|                      | Propionic acid              | 79-09-4             |                  | 141                | 4             | 6         | 4           | 8             | 8              | 5          | 7             | 7                  | 9                        | 6                      |    |
|                      | Methanesulfonic acid        | 75-75-2             |                  | 167                | 2             | 5         | 5           | 10            | 6              | 6          | 4             | 10                 | 9                        | 6                      |    |
|                      | Formic acid                 | 64-18-6             |                  | 101                | 5             | 4         | 8           | 6             | 8              | 8          | 4             | 4                  | 7                        | 7                      |    |
|                      | Acetic acid (glacial)       | 64-19-7             |                  | 118                | 3             | 5         | 4           | 7             | 8              | 4          | 7             | 5                  | 8                        | 6                      |    |
| Alcohols             | 1,3-Propanediol             | 504-63-2            |                  | 214                | 4             | 5         | 5           | 10            | 10             | 6          | 10            | 9                  | 10                       | 10                     |    |
|                      | 1-Pentanol                  | 71-41-0             |                  | 137                | 7             | 8         | 8           | 9             | 9              | 4          | 10            | 9                  | 9                        | 10                     |    |
|                      | 2-Ethyl hexanol             | 104-76-7            |                  | 185                | 9             | 8         | 8           | 10            | 7              | 5          | 7             | 10                 | 9                        | 9                      |    |
|                      | 1-Heptanol                  | 111-70-6            |                  | 178                | 9             | 8         | 10          | 9             | 8              | 4          | 10            | 7                  | 9                        | 10                     |    |
|                      | Ethylene glycol             | 107-21-1            |                  | 197                | 4             | 5         | 5           | 10            | 10             | 8          | 7             | 10                 | 10                       | 10                     |    |
|                      | Di(ethylene glycol)         | 111-46-6            |                  | 246                | 4             | 5         | 5           | 10            | 10             | 8          | 7             | 10                 | 10                       | 9                      |    |
|                      | Tri(ethylene glycol)        | 112-27-6            |                  | 285                | 4             | 5         | 5           | 10            | 9              | 6          | 10            | 10                 | 10                       | 9                      |    |
|                      | 1,2-Propanediol             | 57-55-6             |                  | 188                | 4             | 5         | 5           | 10            | 10             | 6          | 7             | 10                 | 10                       | 10                     |    |
|                      | Benzyl alcohol              | 100-51-6            |                  | 205                | 7             | 6         | 6           | 10            | 8              | 6          | 7             | 9                  | 10                       | 8                      |    |
|                      | Isoamyl alcohol             | 123-51-3            |                  | 131                | 7             | 8         | 6           | 8             | 8              | 9          | 3             | 10                 | 9                        | 9                      |    |
|                      | 1-Octanol                   | 111-87-5            |                  | 195                | 9             | 7         | 8           | 10            | 5              | 4          | 7             | 10                 | 9                        | 10                     |    |
|                      | Glycerol                    | 56-81-5             |                  | 290                | 4             | 5         | 5           | 10            | 10             | 8          | 4             | 10                 | 10                       | 10                     |    |
|                      | 1,4-butanediol              | 110-63-4            |                  | 235                | 4             | 5         | 4           | 9             | 10             | 6          | 7             | 9                  | 10                       | 10                     |    |
|                      | Cyclohexanol                | 108-93-0            |                  | 161                | 7             | 7         | 6           | 9             | 8              | 5          | 7             | 9                  | 9                        | 9                      |    |
|                      | Isobutanol                  | 78-83-1             |                  | 108                | 6             | 3         | 5           | 7             | 10             | 6          | 7             | 7                  | 8                        | 9                      |    |
|                      | 2-Pentanol                  | 6032-29-7           |                  | 119                | 7             | 8         | 5           | 8             | 9              | 4          | 7             | 7                  | 8                        | 9                      |    |
|                      | 1-Hexanol                   | 111-27-3            |                  | 157                | 5             | 6         | 3           | 9             | 8              | 5          | 7             | 9                  | 9                        | 10                     |    |
|                      | 1-Butanol                   | 71-36-3             |                  | 118                | 6             | 7         | 5           | 8             | 9              | 3          | 7             | 7                  | 8                        | 9                      |    |
|                      | 1-Propanol                  | 71-23-8             |                  | 97                 | 5             | 3         | 3           | 6             | 10             | 4          | 10            | 7                  | 8                        | 10                     |    |
|                      | Ethanol                     | 64-17-5             |                  | 78                 | 5             | 5         | 3           | 4             | 9              | 5          | 10            | 8                  | 6                        | 10                     |    |
|                      | 2-Butanol                   | 78-92-2             |                  | 100                | 5             | 3         | 3           | 6             | 10             | 4          | 10            | 7                  | 8                        | 9                      |    |
|                      | 2-Propanol                  | 67-63-0             |                  | 82                 | 5             | 5         | 3           | 5             | 8              | 7          | 10            | 6                  | 6                        | 8                      |    |
|                      | t-Amyl alcohol              | 75-85-4             |                  | 102                | 6             | 3         | 4           | 7             | 9              | 5          | 7             | 6                  | 8                        | 10                     |    |
|                      | 1,2-Isopropylidene glycerol | 100-79-8            |                  | 192                | 6             | 5         | 5           | 10            | 4              | 6          | 4             | 8                  | 10                       | 10                     |    |
|                      | t-Butanol                   | 75-65-0             |                  | 82                 | 5             | 5         | 3           | 5             | 9              | 7          | 7             | 5                  | 6                        | 10                     |    |
|                      | IMS (ethanol, denatured)    | 64-17-5             |                  | 78                 | 5             | 5         | 3           | 5             | 9              | 5          | 4             | 7                  | 6                        | 10                     |    |
|                      | Methanol                    | 67-56-1             |                  | 65                 | 4             | 7         | 3           | 3             | 10             | 7          | 4             | 6                  | 5                        | 10                     |    |
|                      | Tetrahydrofurfuryl alcohol  | 97-99-4             |                  | 178                | 4             | 4         | 4           | 8             | 9              | 6          | 1             | 5                  | 9                        | 6                      |    |
|                      | 2-Methoxyethanol            | 109-86-4            |                  | 124                | 4             | 5         | 4           | 7             | 10             | 5          | 1             | 2                  | 8                        | 6                      |    |
|                      | Esters                      | Glycerol triacetate | 102-76-1         |                    | 259           | 5         | 5           | 7             | 10             | 9          | 10            | 10                 | 10                       | 9                      | 10 |
|                      |                             | Glycerol diacetate  | 111-55-7         |                    | 187           | 5         | 6           | 6             | 10             | 6          | 8             | 10                 | 8                        | 10                     | 10 |
|                      |                             | Isobutyl acetate    | 110-19-0         |                    | 116           | 7         | 9           | 8             | 6              | 9          | 6             | 10                 | 6                        | 8                      | 10 |
| Amyl acetate         |                             | 628-63-7            |                  | 146                | 7             | 8         | 8           | 8             | 9              | 5          | 7             | 8                  | 8                        | 10                     |    |
| 2-Ethylhexyl acetate |                             | 103-09-3            |                  | 199                | 9             | 7         | 9           | 10            | 4              | 6          | 10            | 7                  | 9                        | 10                     |    |
| Butyl acetate        |                             | 123-86-4            |                  | 126                | 8             | 9         | 7           | 8             | 8              | 3          | 10            | 8                  | 8                        | 10                     |    |
| Methyl oleate        |                             | 112-62-9            |                  | 218                | 9             | 6         | 8           | 10            | 5              | 8          | 4             | 10                 | 7                        | 10                     |    |
| Isoamyl acetate      |                             | 123-92-2            |                  | 142                | 9             | 9         | 8           | 8             | 4              | 6          | 7             | 8                  | 8                        | 10                     |    |
| Isopropyl acetate    |                             | 108-21-4            |                  | 89                 | 6             | 7         | 5           | 5             | 9              | 5          | 10            | 6                  | 6                        | 10                     |    |
| Propyl acetate       |                             | 109-60-4            |                  | 102                | 6             | 4         | 6           | 6             | 9              | 5          | 10            | 7                  | 7                        | 10                     |    |
| Dimethyl succinate   |                             | 106-65-0            |                  | 200                | 4             | 5         | 6           | 10            | 9              | 7          | 4             | 7                  | 9                        | 10                     |    |
| n-Octyl acetate      |                             | 112-14-1            |                  | 210                | 9             | 7         | 9           | 10            | 3              | 8          | 4             | 7                  | 8                        | 10                     |    |
| Ethyl acetate        |                             | 141-78-6            |                  | 77                 | 5             | 6         | 5           | 4             | 9              | 5          | 10            | 7                  | 5                        | 10                     |    |
| Ethyl lactate        |                             | 97-64-3             |                  | 154                | 4             | 6         | 4           | 8             | 9              | 6          | 4             | 6                  | 8                        | 10                     |    |
| Diethyl succinate    |                             | 123-25-1            |                  | 218                | 7             | 7         | 9           | 10            | 9              | 8          | 4             | 8                  | 9                        | 10                     |    |
| Dimethyl adipate     |                             | 627-93-0            |                  | 110                | 8             | 5         | 10          | 10            | 8              | 8          | 4             | 8                  | 9                        | 10                     |    |
| γ-Valerolactone      |                             | 108-29-2            |                  | 207                | 8             | 7         | 10          | 9             | 10             | 6          | 4             | 7                  | 9                        | 10                     |    |
| Diisopropyl adipate  |                             | 6938-94-9           |                  | 136                | 5             | 7         | 6           | 10            | 7              | 8          | 4             | 10                 | 9                        | 10                     |    |
| Methyl lactate       |                             | 547-64-8            |                  | 144                | 4             | 6         | 4           | 8             | 9              | 6          | 10            | 6                  | 8                        | 9                      |    |
| t-Butyl acetate      |                             | 540-88-5            |                  | 95                 | 7             | 4         | 6           | 6             | 6              | 5          | 7             | 6                  | 6                        | 10                     |    |
| Ethyl formate        | 109-94-4                    |                     | 54               | 5                  | 8             | 4         | 2           | 8             | 7              | 10         | 5             | 4                  | 10                       |                        |    |
| Methyl acetate       | 79-20-9                     |                     | 57               | 4                  | 7             | 3         | 2           | 9             | 6              | 10         | 6             | 4                  | 10                       |                        |    |
| Methyl propionate    | 554-12-1                    |                     | 79               | 5                  | 5             | 5         | 4           | 10            | 6              | 7          | 3             | 4                  | 10                       |                        |    |
| Ethyl propionate     | 105-37-3                    |                     | 99               | 7                  | 3             | 6         | 6           | 6             | 6              | 4          | 4             | 7                  | 6                        |                        |    |
| Methyl formate       | 107-31-3                    |                     | 33               | 3                  | 7             | 3         | 1           | 9             | 9              | 7          | 4             | 3                  | 9                        |                        |    |
| Carbonates           | Propylene carbonate         | 108-32-7            |                  | 242                | 4             | 5         | 6           | 10            | 10             | 10         | 10            | 10                 | 10                       | 10                     |    |
|                      | Ethylene carbonate          | 96-49-1             |                  | 248                | 3             | 5         | 5           | 10            | 10             | 10         | 7             | 10                 | 10                       | 9                      |    |
|                      | Diethyl carbonate           | 105-58-8            |                  | 126                | 7             | 9         | 9           | 7             | 9              | 8          | 4             | 5                  | 8                        | 10                     |    |
|                      | Dimethyl carbonate          | 616-38-6            |                  | 91                 | 4             | 3         | 5           | 5             | 9              | 7          | 10            | 6                  | 6                        | 10                     |    |
|                      | Butylene carbonate          | 4437-85-8           |                  | 250                | 5             | 5         | 7           | 10            | 9              | 9          | 4             | 9                  | 9                        | 10                     |    |

| Classification   | Solvent Name                      | CAS Number | Composite Colour | Boiling Point (°C) | Incentration | Recycling | Biotreatment | VOC Emissions | Aquatic Impact | Air Impact | Health Hazard | Exposure potential | Flammability & Explosion | Reactivity & Stability |
|------------------|-----------------------------------|------------|------------------|--------------------|--------------|-----------|--------------|---------------|----------------|------------|---------------|--------------------|--------------------------|------------------------|
| Ketones          | Cyclopentanone                    | 120-92-3   | Green            | 131                | 8            | 9         | 6            | 7             | 10             | 5          | 7             | 6                  | 8                        | 10                     |
|                  | Cyclohexanone                     | 108-94-1   | Green            | 155                | 7            | 8         | 6            | 8             | 8              | 6          | 7             | 6                  | 8                        | 9                      |
|                  | 3-Pentanone                       | 96-22-0    | Green            | 102                | 7            | 3         | 5            | 6             | 10             | 4          | 10            | 7                  | 7                        | 9                      |
|                  | Methylisobutyl ketone             | 108-10-1   | Green            | 117                | 7            | 8         | 5            | 7             | 9              | 3          | 7             | 6                  | 7                        | 9                      |
|                  | 2-Pentanone                       | 107-87-9   | Green            | 102                | 7            | 3         | 5            | 6             | 9              | 3          | 10            | 7                  | 6                        | 10                     |
|                  | Methylethyl ketone                | 78-93-3    | Yellow           | 80                 | 5            | 5         | 3            | 4             | 8              | 4          | 10            | 6                  | 5                        | 9                      |
| Aromatics        | Acetone                           | 67-64-1    | Yellow           | 56                 | 5            | 6         | 2            | 2             | 10             | 6          | 10            | 6                  | 4                        | 9                      |
|                  | 2,4,6-Collidine                   | 108-75-8   | Green            | 171                | 7            | 9         | 6            | 8             | 10             | 5          | 7             | 8                  | 9                        | 9                      |
|                  | Anisole                           | 100-66-3   | Green            | 154                | 8            | 8         | 8            | 8             | 7              | 6          | 7             | 8                  | 7                        | 9                      |
|                  | Ethoxybenzene                     | 103-73-1   | Green            | 170                | 9            | 9         | 8            | 9             | 9              | 5          | 4             | 6                  | 9                        | 10                     |
|                  | p-Xylene                          | 106-42-3   | Yellow           | 138                | 10           | 9         | 6            | 7             | 5              | 2          | 7             | 7                  | 5                        | 10                     |
|                  | Mesitylene                        | 108-67-8   | Yellow           | 165                | 10           | 8         | 7            | 8             | 3              | 3          | 7             | 8                  | 6                        | 10                     |
|                  | p-Cymene                          | 99-87-6    | Yellow           | 177                | 10           | 8         | 7            | 9             | 3              | 2          | 10            | 6                  | 6                        | 9                      |
|                  | Cumene                            | 98-82-8    | Yellow           | 152                | 10           | 8         | 7            | 8             | 3              | 4          | 7             | 7                  | 6                        | 6                      |
|                  | Toluene                           | 108-88-3   | Yellow           | 111                | 10           | 7         | 6            | 7             | 7              | 2          | 7             | 6                  | 5                        | 10                     |
|                  | Trifluorotoluene                  | 98-08-8    | Yellow           | 102                | 4            | 4         | 5            | 6             | 3              | 8          | 10            | 4                  | 4                        | 10                     |
|                  | Pyridine                          | 110-86-1   | Red              | 115                | 3            | 6         | 2            | 7             | 7              | 3          | 4             | 4                  | 8                        | 9                      |
| Hydrocarbons     | Benzene                           | 71-43-2    | Red              | 80                 | 9            | 6         | 6            | 4             | 7              | 5          | 1             | 1                  | 3                        | 10                     |
|                  | Isooctane                         | 540-84-1   | Yellow           | 99                 | 10           | 4         | 5            | 6             | 2              | 5          | 10            | 7                  | 3                        | 10                     |
|                  | cis-Decalin                       | 493-01-6   | Yellow           | 196                | 10           | 7         | 6            | 9             | 2              | 5          | 4             | 5                  | 7                        | 9                      |
|                  | Heptane                           | 142-82-5   | Yellow           | 98                 | 10           | 4         | 5            | 6             | 3              | 5          | 10            | 6                  | 3                        | 10                     |
|                  | L-Limonene                        | 5989-54-8  | Yellow           | 175                | 10           | 8         | 7            | 9             | 3              | 3          | 4             | 6                  | 5                        | 10                     |
|                  | Cyclohexane                       | 110-82-7   | Yellow           | 81                 | 10           | 6         | 5            | 4             | 3              | 5          | 10            | 6                  | 2                        | 10                     |
|                  | D-Limonene                        | 5989-27-5  | Yellow           | 175                | 10           | 8         | 7            | 9             | 3              | 3          | 4             | 7                  | 5                        | 10                     |
|                  | Methyl cyclohexane                | 108-87-2   | Yellow           | 101                | 10           | 4         | 5            | 6             | 1              | 5          | 10            | 7                  | 3                        | 10                     |
|                  | Methylcyclopentane                | 96-37-7    | Red              | 72                 | 10           | 7         | 5            | 3             | 6              | 3          | 10            | 7                  | 2                        | 9                      |
|                  | Pentane                           | 109-66-0   | Red              | 36                 | 10           | 10        | 4            | 1             | 3              | 6          | 10            | 5                  | 2                        | 10                     |
|                  | 2-Methylpentane                   | 107-83-5   | Red              | 60                 | 10           | 9         | 4            | 2             | 3              | 3          | 10            | 7                  | 2                        | 10                     |
|                  | Hexane                            | 110-54-3   | Red              | 69                 | 10           | 8         | 4            | 3             | 3              | 5          | 7             | 4                  | 2                        | 10                     |
| Ethers           | Petroleum spirit                  | 8032-32-4  | Red              | 55                 | 8            | 9         | 4            | 2             | 5              | 5          | 1             | 6                  | 2                        | 10                     |
|                  | Diethylene glycol monobutyl ether | 112-34-5   | Green            | 231                | 4            | 4         | 4            | 10            | 9              | 8          | 7             | 10                 | 9                        | 6                      |
|                  | Dimethyl isosorbide               | 5306-85-4  | Yellow           | 236                | 4            | 4         | 5            | 10            | 9              | 6          | 4             | 9                  | 9                        | 8                      |
|                  | Dibutyl ether                     | 142-96-1   | Yellow           | 140                | 10           | 8         | 7            | 8             | 4              | 4          | 10            | 5                  | 7                        | 6                      |
|                  | t-Amyl methyl ether               | 994-05-8   | Yellow           | 86                 | 7            | 6         | 5            | 5             | 9              | 4          | 7             | 5                  | 5                        | 9                      |
|                  | 1,2,3-trimethoxypropane           | 20637-49-4 | Yellow           | 143                | 4            | 5         | 4            | 8             | 7              | 7          | 4             | 5                  | 8                        | 9                      |
|                  | Diphenyl ether                    | 101-84-8   | Yellow           | 258                | 9            | 7         | 9            | 10            | 3              | 3          | 4             | 9                  | 9                        | 6                      |
|                  | t-Butyl ethyl ether               | 637-92-3   | Yellow           | 70                 | 8            | 7         | 5            | 3             | 8              | 3          | 7             | 4                  | 4                        | 9                      |
|                  | 1,3-Dioxolane                     | 646-06-0   | Yellow           | 75                 | 4            | 4         | 3            | 4             | 7              | 5          | 7             | 5                  | 2                        | 9                      |
|                  | Cyclopentyl methyl ether          | 5614-37-9  | Yellow           | 106                | 8            | 4         | 5            | 6             | 4              | 3          | 4             | 4                  | 6                        | 9                      |
|                  | Diethoxymethane                   | 462-95-3   | Yellow           | 88                 | 6            | 5         | 4            | 4             | 5              | 7          | 4             | 3                  | 4                        | 8                      |
|                  | 2-Methyltetrahydrofuran           | 96-47-9    | Yellow           | 78                 | 6            | 5         | 3            | 4             | 7              | 4          | 4             | 3                  | 4                        | 6                      |
|                  | t-Butylmethyl ether               | 1634-04-4  | Red              | 55                 | 7            | 8         | 4            | 2             | 7              | 5          | 7             | 4                  | 3                        | 9                      |
|                  | Diisopropyl ether                 | 108-20-3   | Red              | 68                 | 9            | 7         | 6            | 3             | 5              | 4          | 10            | 6                  | 4                        | 3                      |
|                  | Dimethoxymethane                  | 109-87-5   | Red              | 42                 | 5            | 6         | 3            | 1             | 6              | 6          | 10            | 7                  | 3                        | 5                      |
|                  | Tetrahydrofuran                   | 109-99-9   | Red              | 65                 | 5            | 5         | 2            | 3             | 9              | 3          | 7             | 5                  | 4                        | 6                      |
|                  | Bis(2-methoxyethyl) ether         | 111-96-6   | Red              | 162                | 4            | 5         | 4            | 8             | 9              | 5          | 1             | 4                  | 6                        | 6                      |
|                  | 1,4-Dioxane                       | 123-91-1   | Red              | 102                | 4            | 1         | 3            | 6             | 8              | 4          | 4             | 3                  | 4                        | 6                      |
|                  | Diethyl ether                     | 60-29-7    | Red              | 35                 | 7            | 7         | 3            | 1             | 5              | 3          | 10            | 4                  | 2                        | 6                      |
|                  | 1,2-Dimethoxyethane               | 110-71-4   | Red              | 85                 | 4            | 4         | 3            | 5             | 8              | 7          | 1             | 4                  | 4                        | 6                      |
| Dimethyl ether   | 115-10-6                          | Red        | -25              | 6                  | 1            | 4         | 1            | 7             | 7              | 10         | 4             | 2                  | 5                        |                        |
| Dipolar Aprotics | Dimethylpropylene urea            | 7226-23-5  | Yellow           | 247                | 5            | 7         | 6            | 10            | 5              | 6          | 4             | 10                 | 9                        | 9                      |
|                  | Dimethyl sulphoxide               | 67-68-5    | Yellow           | 189                | 3            | 4         | 4            | 9             | 8              | 6          | 7             | 9                  | 9                        | 5                      |
|                  | 1,3-Dimethyl-2-imidazolidinone    | 80-73-9    | Yellow           | 225                | 3            | 4         | 3            | 10            | 7              | 6          | 4             | 8                  | 9                        | 9                      |
|                  | Acetonitrile                      | 75-05-8    | Yellow           | 82                 | 3            | 5         | 1            | 4             | 10             | 8          | 7             | 5                  | 6                        | 10                     |
|                  | Propanenitrile                    | 107-12-0   | Yellow           | 97                 | 4            | 3         | 2            | 5             | 10             | 7          | 4             | 4                  | 6                        | 10                     |
|                  | Sulfolane                         | 126-33-0   | Red              | 282                | 3            | 5         | 5            | 10            | 6              | 6          | 1             | 10                 | 10                       | 10                     |
|                  | Formamide                         | 75-12-7    | Red              | 220                | 2            | 4         | 4            | 10            | 10             | 6          | 1             | 10                 | 10                       | 8                      |
|                  | N-Methyl pyrrolidone              | 872-50-4   | Red              | 202                | 3            | 4         | 3            | 10            | 10             | 6          | 1             | 9                  | 9                        | 9                      |
|                  | Dimethyl acetamide                | 127-19-5   | Red              | 165                | 3            | 6         | 3            | 9             | 10             | 6          | 1             | 7                  | 9                        | 9                      |
|                  | N-Ethylpyrrolidone                | 2687-91-4  | Red              | 212                | 3            | 4         | 3            | 10            | 9              | 6          | 1             | 8                  | 9                        | 9                      |
|                  | N-Methylformamide                 | 123-39-7   | Red              | 200                | 2            | 5         | 3            | 10            | 10             | 6          | 1             | 5                  | 10                       | 10                     |
|                  | Dimethyl formamide                | 68-12-2    | Red              | 153                | 3            | 6         | 3            | 8             | 10             | 4          | 1             | 6                  | 9                        | 9                      |
|                  | Tetramethylurea                   | 632-22-4   | Red              | 177                | 3            | 5         | 2            | 9             | 5              | 5          | 1             | 4                  | 10                       | 10                     |
|                  | Carbon disulfide                  | 75-15-0    | Red              | 46                 | 4            | 8         | 7            | 1             | 6              | 4          | 4             | 1                  | 1                        | 6                      |



| Classification         | Solvent Name           | CAS Number   | Composite Colour | Boiling Point (°C) | Incineration | Recycling | Bioremediation | Emissions VOC | Aquatic Impact | Air Impact | Hazard | Health | Exposure potential | Flammability & Explosion | Reactivity & Stability |
|------------------------|------------------------|--------------|------------------|--------------------|--------------|-----------|----------------|---------------|----------------|------------|--------|--------|--------------------|--------------------------|------------------------|
| Halogenated            | 1,2,4-Trichlorobenzene | 120-82-1     | Green            | 214                | 3            | 7         | 7              | 10            | 1              | 9          | 4      | 6      | 9                  | 10                       |                        |
|                        | Chlorobenzene          | 108-90-7     | Green            | 132                | 4            | 9         | 7              | 7             | 2              | 7          | 4      | 4      | 8                  | 10                       |                        |
|                        | 1,2-Dichlorobenzene    | 95-50-1      | Green            | 180                | 4            | 8         | 6              | 7             | 1              | 6          | 7      | 6      | 8                  | 10                       |                        |
|                        | Trichloroacetonitrile  | 545-06-2     | Green            | 83                 | 4            | 8         | 5              | 4             | 3              | 4          | 4      | 3      | 7                  | 10                       |                        |
|                        | Perfluorotoluene       | 434-64-0     | Green            | 104                | 4            | 4         | 6              | 6             | 1              | 7          | 4      | 4      | 5                  | 10                       |                        |
|                        | Fluorobenzene          | 462-06-6     | Yellow           | 85                 | 4            | 7         | 5              | 4             | 3              | 4          | 4      | 3      | 4                  | 10                       |                        |
|                        | Perfluorocyclic ether  | 335-36-4     | Yellow           | 103                | 4            | 4         | 6              | 6             | 1              | 7          | 4      | 4      | 5                  | 10                       |                        |
|                        | Dichloromethane        | 75-09-2      | Green            | 40                 | 2            | 10        | 4              | 1             | 8              | 6          | 7      | 4      | 4                  | 10                       |                        |
|                        | 1,2-Dichloroethane     | 107-06-2     | Green            | 84                 | 2            | 7         | 5              | 5             | 9              | 7          | 1      | 2      | 5                  | 10                       |                        |
|                        | Perfluorocyclohexane   | 355-68-0     | Green            | 53                 | 4            | 9         | 5              | 2             | 4              | 7          | 4      | 2      | 9                  | 10                       |                        |
|                        | Chloroform             | 67-66-3      | Yellow           | 61                 | 3            | 9         | 5              | 3             | 7              | 5          | 4      | 1      | 5                  | 10                       |                        |
|                        | Trichloroacetic acid   | 76-03-9      | Yellow           | 197                | 1            | 4         | 3              | 9             | 2              | 5          | 4      | 6      | 10                 | 6                        |                        |
|                        | Chloroacetic acid      | 79-11-8      | Yellow           | 189                | 1            | 4         | 4              | 9             | 6              | 4          | 1      | 5      | 10                 | 6                        |                        |
|                        | Trifluoroacetic acid   | 76-05-1      | Yellow           | 72                 | 1            | 5         | 2              | 4             | 4              | 4          | 4      | 3      | 7                  | 6                        |                        |
|                        | Perfluorohexane        | 355-42-0     | Yellow           | 57                 | 4            | 10        | 5              | 2             | 1              | 7          | 4      | 2      | 4                  | 10                       |                        |
|                        | Carbon tetrachloride   | 56-23-5      | Yellow           | 77                 | 3            | 7         | 5              | 4             | 4              | 1          | 4      | 1      | 4                  | 10                       |                        |
| 2,2,2-Trifluoroethanol | 75-89-8                | Red          | 74               | 1                  | 5            | 2         | 4              | 5             | 4              | 1          | 1      | 6      | 9                  |                          |                        |
| Other                  | Furfural               | 98-01-1      | Red              | 162                | 7            | 8         | 8              | 8             | 8              | 4          | 4      | 6      | 9                  | 9                        |                        |
|                        | N,N-Dimethyldecanamide | 14433-76-2   | Yellow           | 291                | 6            | 7         | 6              | 10            | 4              | 6          | 10     | 10     | 10                 | 10                       |                        |
|                        | Dihydrolevoglucosenone | 1087696-49-8 | Yellow           | 203                | 4            | 4         | 5              | 10            | 9              | 6          | 4      | 8      | 10                 | 10                       |                        |
|                        | N,N-Dimethyloctanamide | 1118-92-9    | Yellow           | 261                | 5            | 6         | 5              | 8             | 7              | 5          | 4      | 6      | 9                  | 10                       |                        |
|                        | N,N-Dimethylaniline    | 121-69-7     | Yellow           | 194                | 7            | 7         | 6              | 9             | 3              | 4          | 4      | 8      | 9                  | 9                        |                        |
|                        | Acetic anhydride       | 108-24-7     | Yellow           | 140                | 4            | 6         | 4              | 8             | 8              | 7          | 4      | 4      | 8                  | 6                        |                        |
|                        | Nitromethane           | 75-52-5      | Yellow           | 101                | 2            | 1         | 4              | 6             | 6              | 8          | 7      | 5      | 7                  | 1                        |                        |
|                        | Triethylamine          | 121-44-8     | Yellow           | 89                 | 4            | 4         | 1              | 5             | 8              | 3          | 4      | 3      | 5                  | 6                        |                        |



# GSK Solvent Sustainability Guide

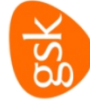

## Column Headings Colour Key

|              |
|--------------|
| Waste        |
| Environment  |
| Human Health |
| Safety       |

## Composite Colour Key

|                    |
|--------------------|
| Few Known Issues   |
| Some Known Issues  |
| Major Known Issues |

\*The scoring assessment for this solvent includes 4 or more data gaps, therefore there is a lower level of confidence in the solvent's placement on this guide.

\*A blank value for Life Cycle Analysis (LCA) indicates that this data is currently not available.

\*The composite colour represents an overall categorization of the holistic sustainability of a solvent, taking all category scores into consideration.

| Classification   | Solvent Name             | CAS Number | Composite Colour† | Boiling Point (°C) | Incentration | Recycling | Biotreatment | VOC Emissions | Aquatic Impact | Air Impact | Health Hazard | Exposure potential | Flammability & Explosion | Reactivity & Stability | Life Cycle Analysis* |   |
|------------------|--------------------------|------------|-------------------|--------------------|--------------|-----------|--------------|---------------|----------------|------------|---------------|--------------------|--------------------------|------------------------|----------------------|---|
| Water & Acids    | Water                    | 7732-18-5  |                   | 100                | 4            | 2         | 4            | 6             | 10             | 8          | 10            | 9                  | 8                        | 10                     | 10                   |   |
|                  | Acetic Acid              | 64-19-7    |                   | 118                | 3            | 5         | 4            | 7             | 8              | 4          | 7             | 5                  | 8                        | 6                      | 8                    |   |
|                  | Trifluoroacetic acid*    | 76-05-1    |                   | 72                 | 1            | 5         | 2            | 4             | 4              | 4          | 4             | 3                  | 7                        | 6                      |                      |   |
|                  | 1-Heptanol               | 111-70-6   |                   | 178                | 9            | 8         | 10           | 9             | 8              | 4          | 10            | 7                  | 9                        | 10                     |                      |   |
| Alcohols         | Ethylene glycol          | 107-21-1   |                   | 197                | 4            | 5         | 5            | 10            | 10             | 8          | 7             | 10                 | 10                       | 10                     | 9                    |   |
|                  | 1-Octanol                | 111-87-5   |                   | 195                | 9            | 7         | 8            | 10            | 5              | 4          | 7             | 10                 | 9                        | 10                     |                      |   |
|                  | 1-Butanol                | 71-36-3    |                   | 118                | 6            | 7         | 5            | 8             | 9              | 3          | 7             | 7                  | 8                        | 9                      | 5                    |   |
|                  | 1-Propanol               | 71-23-8    |                   | 97                 | 5            | 3         | 3            | 6             | 10             | 4          | 10            | 7                  | 8                        | 10                     | 7                    |   |
|                  | Ethanol                  | 64-17-5    |                   | 78                 | 5            | 5         | 3            | 4             | 9              | 5          | 10            | 8                  | 6                        | 10                     |                      |   |
|                  | 2-Propanol               | 67-63-0    |                   | 82                 | 5            | 5         | 3            | 5             | 8              | 7          | 10            | 6                  | 6                        | 8                      | 4                    |   |
|                  | t-Butanol                | 75-65-0    |                   | 82                 | 5            | 5         | 3            | 5             | 9              | 7          | 7             | 5                  | 6                        | 10                     | 8                    |   |
|                  | IMS (ethanol, denatured) | 64-17-5    |                   | 78                 | 5            | 5         | 3            | 5             | 9              | 5          | 4             | 7                  | 6                        | 10                     |                      |   |
|                  | Methanol                 | 67-56-1    |                   | 65                 | 4            | 7         | 3            | 3             | 10             | 7          | 4             | 4                  | 6                        | 5                      | 10                   | 9 |
|                  | Glycerol diacetate       | 111-55-7   |                   | 187                | 5            | 6         | 6            | 10            | 6              | 8          | 10            | 8                  | 10                       | 10                     |                      |   |
| Esters           | Isobutyl acetate         | 110-19-0   |                   | 116                | 7            | 9         | 8            | 6             | 9              | 6          | 10            | 6                  | 8                        | 10                     |                      |   |
|                  | Isobutyl acetate         | 123-92-2   |                   | 142                | 9            | 9         | 8            | 8             | 4              | 6          | 7             | 8                  | 8                        | 10                     |                      |   |
|                  | Isopropyl acetate        | 108-21-4   |                   | 89                 | 6            | 7         | 5            | 5             | 9              | 5          | 10            | 6                  | 6                        | 10                     | 7                    |   |
|                  | Ethyl acetate            | 141-78-6   |                   | 77                 | 5            | 6         | 5            | 4             | 9              | 5          | 10            | 7                  | 5                        | 10                     | 6                    |   |
| Carbonates       | Propylene carbonate*     | 108-32-7   |                   | 242                | 4            | 5         | 6            | 10            | 10             | 10         | 10            | 10                 | 10                       | 10                     |                      |   |
|                  | Diethyl carbonate*       | 105-58-8   |                   | 126                | 7            | 9         | 9            | 7             | 9              | 8          | 4             | 5                  | 8                        | 10                     |                      |   |
|                  | Dimethyl carbonate       | 616-38-6   |                   | 91                 | 4            | 3         | 5            | 5             | 9              | 7          | 10            | 6                  | 6                        | 10                     | 8                    |   |
|                  | Cyclopentanone           | 120-92-3   |                   | 131                | 8            | 9         | 6            | 7             | 10             | 5          | 7             | 6                  | 8                        | 10                     | 6                    |   |
| Ketones          | Methylisobutyl ketone    | 108-10-1   |                   | 117                | 7            | 8         | 5            | 7             | 9              | 3          | 7             | 6                  | 7                        | 9                      | 2                    |   |
|                  | Methyl ethyl ketone      | 78-93-3    |                   | 80                 | 5            | 5         | 3            | 4             | 8              | 4          | 10            | 6                  | 5                        | 9                      | 3                    |   |
|                  | Acetone                  | 67-64-1    |                   | 56                 | 5            | 6         | 2            | 2             | 10             | 6          | 10            | 6                  | 4                        | 9                      | 7                    |   |
| Aromatics        | Anisole                  | 100-66-3   |                   | 154                | 8            | 8         | 8            | 8             | 7              | 6          | 7             | 8                  | 7                        | 9                      | 5                    |   |
|                  | p-Xylene                 | 106-42-3   |                   | 138                | 10           | 9         | 6            | 7             | 5              | 2          | 7             | 7                  | 5                        | 10                     | 7                    |   |
|                  | p-Cymene*                | 95-87-6    |                   | 177                | 10           | 8         | 7            | 9             | 3              | 2          | 10            | 6                  | 6                        | 9                      |                      |   |
|                  | Toluene                  | 108-88-3   |                   | 111                | 10           | 7         | 6            | 7             | 2              | 7          | 7             | 6                  | 5                        | 10                     | 7                    |   |
|                  | Trifluorotoluene         | 98-08-8    |                   | 102                | 4            | 4         | 5            | 6             | 3              | 8          | 10            | 4                  | 4                        | 10                     |                      |   |
|                  | Pyridine                 | 110-86-1   |                   | 115                | 3            | 6         | 2            | 7             | 7              | 3          | 4             | 4                  | 8                        | 9                      | 2                    |   |
|                  | Benzene                  | 71-43-2    |                   | 80                 | 9            | 6         | 6            | 4             | 7              | 5          | 1             | 1                  | 3                        | 10                     | 7                    |   |
|                  | Isooctane                | 540-84-1   |                   | 99                 | 10           | 4         | 5            | 6             | 2              | 5          | 10            | 7                  | 3                        | 10                     | 7                    |   |
|                  | Heptane                  | 142-82-5   |                   | 98                 | 10           | 4         | 5            | 6             | 3              | 5          | 10            | 6                  | 3                        | 10                     | 7                    |   |
|                  | Cyclohexane              | 110-82-7   |                   | 81                 | 10           | 6         | 5            | 4             | 3              | 5          | 10            | 6                  | 2                        | 10                     | 7                    |   |
| Hydrocarbons     | Hexane                   | 110-54-3   |                   | 69                 | 10           | 8         | 4            | 3             | 3              | 5          | 7             | 4                  | 2                        | 10                     | 7                    |   |
|                  | Petroleum spirits        | 8032-32-4  |                   | 55                 | 8            | 9         | 4            | 2             | 5              | 5          | 1             | 6                  | 2                        | 10                     | 7                    |   |
|                  | Dimethyl isosorbide*     | 5306-85-4  |                   | 236                | 4            | 4         | 5            | 10            | 9              | 6          | 4             | 9                  | 9                        | 8                      |                      |   |
|                  | Cyclopentyl methyl ether | 5614-37-9  |                   | 106                | 8            | 4         | 5            | 6             | 4              | 3          | 4             | 4                  | 6                        | 9                      | 4                    |   |
|                  | 2-Methyltetrahydrofuran* | 96-47-9    |                   | 78                 | 6            | 5         | 3            | 4             | 7              | 4          | 4             | 3                  | 4                        | 6                      | 4                    |   |
|                  | t-Butylmethyl ether      | 1634-04-4  |                   | 55                 | 7            | 8         | 4            | 2             | 7              | 5          | 7             | 4                  | 3                        | 9                      | 8                    |   |
|                  | Diisopropyl ether        | 108-20-3   |                   | 68                 | 9            | 7         | 6            | 3             | 5              | 4          | 10            | 6                  | 4                        | 3                      | 9                    |   |
|                  | Tetrahydrofuran          | 109-99-9   |                   | 65                 | 5            | 5         | 2            | 3             | 9              | 3          | 7             | 5                  | 4                        | 6                      | 4                    |   |
|                  | 1,4-Dioxane              | 123-91-1   |                   | 102                | 4            | 1         | 3            | 6             | 8              | 4          | 4             | 3                  | 4                        | 6                      | 6                    |   |
|                  | Diethyl ether            | 60-29-7    |                   | 35                 | 7            | 7         | 3            | 1             | 5              | 3          | 10            | 4                  | 2                        | 6                      | 6                    |   |
| Dipolar Aprotics | 1,2-Dimethoxyethane      | 110-71-4   |                   | 85                 | 4            | 4         | 3            | 5             | 8              | 7          | 1             | 4                  | 4                        | 6                      | 7                    |   |
|                  | Dimethyl sulphoxide      | 67-68-5    |                   | 189                | 3            | 4         | 4            | 9             | 8              | 6          | 7             | 9                  | 9                        | 5                      | 6                    |   |
|                  | Acetonitrile             | 75-05-8    |                   | 82                 | 3            | 5         | 1            | 4             | 10             | 8          | 7             | 5                  | 6                        | 10                     | 4                    |   |
|                  | N-Methylpyrrolidone      | 872-50-4   |                   | 202                | 3            | 4         | 3            | 10            | 10             | 6          | 1             | 9                  | 9                        | 9                      | 4                    |   |
|                  | N,N-Dimethyl acetamide   | 127-19-5   |                   | 165                | 3            | 6         | 3            | 9             | 10             | 6          | 1             | 7                  | 9                        | 9                      | 2                    |   |
|                  | N,N-Dimethyl formamide   | 68-12-2    |                   | 153                | 3            | 6         | 3            | 8             | 10             | 4          | 1             | 6                  | 9                        | 9                      | 7                    |   |
|                  | Dichloromethane          | 75-09-2    |                   | 40                 | 2            | 10        | 4            | 1             | 8              | 6          | 7             | 4                  | 4                        | 10                     | 7                    |   |
|                  | 1,2-Dichloroethane       | 107-06-2   |                   | 84                 | 2            | 7         | 5            | 9             | 7              | 1          | 2             | 5                  | 10                       | 7                      |                      |   |
|                  | Chloroform               | 67-66-3    |                   | 61                 | 3            | 9         | 5            | 3             | 7              | 5          | 4             | 1                  | 5                        | 10                     | 6                    |   |
|                  | Carbon tetrachloride     | 56-23-5    |                   | 77                 | 3            | 7         | 5            | 4             | 4              | 1          | 4             | 1                  | 4                        | 4                      | 10                   | 7 |

Figure 6: Reverse side of updated GSK Solvent Sustainability Guide single page view, providing scoring breakdowns for selected solvents.

## Data for Newly Assessed Solvent Options

| Solvent Name                   | CAS Number   | Solvent Classification | Composite Colour | Boiling Point (°C) | Incineration | Recycle | Biotreatment | VOC Emissions | Environmental Impact: Aqueous | Environmental Impact: Air | Health Hazard | Exposure potential | Safety: Flammability & Explosion | Safety: Reactivity | Number of Data Gaps* |
|--------------------------------|--------------|------------------------|------------------|--------------------|--------------|---------|--------------|---------------|-------------------------------|---------------------------|---------------|--------------------|----------------------------------|--------------------|----------------------|
| Glycerol triacetate            | 102-76-1     | Ester                  | Green            | 259                | 5            | 5       | 7            | 10            | 9                             | 10                        | 10            | 10                 | 9                                | 10                 | 4                    |
| 1-Pentanol                     | 71-41-0      | Alcohol                | Green            | 137                | 7            | 8       | 8            | 9             | 9                             | 4                         | 10            | 9                  | 9                                | 10                 | 0                    |
| 1-Heptanol                     | 111-70-6     | Alcohol                | Green            | 178                | 9            | 8       | 10           | 9             | 8                             | 4                         | 10            | 7                  | 9                                | 10                 | 3                    |
| Glycerol diacetate             | 111-55-7     | Ester                  | Green            | 187                | 5            | 6       | 6            | 10            | 6                             | 8                         | 10            | 8                  | 10                               | 10                 | 1                    |
| Isobutyl acetate               | 110-19-0     | Ester                  | Green            | 116                | 7            | 9       | 8            | 6             | 9                             | 6                         | 10            | 6                  | 8                                | 10                 | 1                    |
| Amyl acetate                   | 628-63-7     | Ester                  | Green            | 146                | 7            | 8       | 8            | 8             | 9                             | 5                         | 7             | 8                  | 8                                | 10                 | 2                    |
| 2,4,6-Collidine                | 108-75-8     | Aromatic               | Green            | 171                | 7            | 9       | 6            | 8             | 10                            | 5                         | 7             | 8                  | 9                                | 9                  | 4                    |
| 2-Ethylhexyl acetate           | 103-09-3     | Ester                  | Green            | 199                | 9            | 7       | 9            | 10            | 4                             | 6                         | 10            | 7                  | 9                                | 10                 | 2                    |
| 1-Octanol                      | 111-87-5     | Alcohol                | Green            | 195                | 9            | 7       | 8            | 10            | 5                             | 4                         | 7             | 10                 | 9                                | 10                 | 1                    |
| Methyl oleate                  | 112-62-9     | Ester                  | Green            | 218                | 9            | 6       | 8            | 10            | 5                             | 8                         | 4             | 10                 | 7                                | 10                 | 3                    |
| Isoamyl acetate                | 123-92-2     | Ester                  | Green            | 142                | 9            | 9       | 8            | 8             | 4                             | 6                         | 7             | 8                  | 8                                | 10                 | 1                    |
| Diethyl carbonate              | 105-58-8     | Carbonate              | Green            | 126                | 7            | 9       | 9            | 7             | 9                             | 8                         | 4             | 5                  | 8                                | 10                 | 4                    |
| Isobutanol                     | 78-83-1      | Alcohol                | Green            | 108                | 6            | 3       | 5            | 7             | 10                            | 6                         | 7             | 7                  | 8                                | 9                  | 0                    |
| 1-Hexanol                      | 111-27-3     | Alcohol                | Green            | 157                | 5            | 6       | 3            | 9             | 8                             | 5                         | 7             | 9                  | 9                                | 10                 | 1                    |
| Dimethyl succinate             | 106-65-0     | Ester                  | Green            | 200                | 4            | 5       | 6            | 10            | 9                             | 7                         | 4             | 7                  | 9                                | 10                 | 4                    |
| Lactic acid                    | 50-21-5      | Acid                   | Green            | 122                | 3            | 8       | 5            | 10            | 9                             | 6                         | 4             | 9                  | 10                               | 8                  | 4                    |
| Furfural                       | 98-01-1      | Other                  | Green            | 162                | 7            | 8       | 8            | 8             | 8                             | 4                         | 4             | 6                  | 9                                | 9                  | 1                    |
| t-Amyl alcohol                 | 75-85-4      | Alcohol                | Green            | 102                | 6            | 3       | 4            | 7             | 9                             | 5                         | 7             | 6                  | 8                                | 10                 | 2                    |
| Diethyl succinate              | 123-25-1     | Ester                  | Green            | 218                | 7            | 7       | 9            | 10            | 9                             | 8                         | 4             | 8                  | 9                                | 10                 | 6                    |
| N,N-Dimethyldecylamide         | 14433-76-2   | Other                  | Green            | 291                | 6            | 7       | 6            | 10            | 4                             | 6                         | 10            | 10                 | 10                               | 10                 | 5                    |
| Dimethyl adipate               | 627-93-0     | Ester                  | Green            | 110                | 8            | 5       | 10           | 10            | 8                             | 8                         | 4             | 8                  | 9                                | 10                 | 5                    |
| Butylene carbonate             | 4437-85-8    | Carbonate              | Green            | 250                | 5            | 5       | 7            | 10            | 9                             | 9                         | 4             | 9                  | 9                                | 10                 | 9                    |
| γ-Valerolactone                | 108-29-2     | Ester                  | Green            | 207                | 8            | 7       | 10           | 9             | 10                            | 6                         | 4             | 7                  | 9                                | 10                 | 9                    |
| Diisopropyl adipate            | 6938-94-9    | Ester                  | Green            | 136                | 5            | 7       | 6            | 10            | 7                             | 8                         | 4             | 10                 | 9                                | 10                 | 8                    |
| Dihydrolevoglucosenone         | 1087696-49-8 | Other                  | Green            | 203                | 4            | 4       | 5            | 10            | 9                             | 6                         | 4             | 8                  | 10                               | 10                 | 9                    |
| Dimethyl isosorbide            | 5306-85-4    | Ether                  | Green            | 236                | 4            | 4       | 5            | 10            | 9                             | 6                         | 4             | 9                  | 9                                | 10                 | 5                    |
| 1,2-Isopropylidene glycerol    | 100-79-8     | Alcohol                | Green            | 192                | 6            | 5       | 5            | 10            | 4                             | 6                         | 4             | 8                  | 10                               | 10                 | 5                    |
| N,N-Dimethyloctanamide         | 1118-92-9    | Other                  | Green            | 261                | 5            | 6       | 5            | 8             | 7                             | 5                         | 4             | 6                  | 9                                | 10                 | 6                    |
| 1,3-Dimethyl-2-imidazolidinone | 80-73-9      | Dipolar aprotic        | Green            | 225                | 3            | 4       | 3            | 10            | 7                             | 6                         | 4             | 8                  | 9                                | 9                  | 6                    |
| Methanesulfonic acid           | 75-75-2      | Acid                   | Green            | 167                | 2            | 5       | 5            | 10            | 6                             | 6                         | 4             | 10                 | 9                                | 6                  | 2                    |
| Formic acid                    | 64-18-6      | Acid                   | Green            | 101                | 5            | 4       | 8            | 6             | 8                             | 8                         | 4             | 4                  | 7                                | 7                  | 0                    |
| 1,2,3-Trimethoxypropane        | 20637-49-4   | Ether                  | Green            | 143                | 4            | 5       | 4            | 8             | 7                             | 7                         | 4             | 5                  | 8                                | 9                  | 10                   |
| Methyl propionate              | 554-12-1     | Ester                  | Green            | 79                 | 5            | 5       | 5            | 4             | 10                            | 7                         | 7             | 3                  | 4                                | 10                 | 4                    |
| L-Limonene                     | 5989-54-8    | Hydrocarbon            | Green            | 175                | 10           | 8       | 7            | 9             | 3                             | 3                         | 4             | 6                  | 5                                | 10                 | 2                    |
| D-Limonene                     | 5989-27-5    | Hydrocarbon            | Green            | 175                | 10           | 8       | 7            | 9             | 3                             | 3                         | 4             | 7                  | 5                                | 10                 | 1                    |
| p-Cymene                       | 99-87-6      | Aromatic               | Green            | 177                | 10           | 8       | 7            | 9             | 3                             | 2                         | 4             | 6                  | 6                                | 9                  | 5                    |
| 1,3-Dioxolane                  | 646-06-0     | Ether                  | Green            | 75                 | 4            | 4       | 3            | 4             | 4                             | 7                         | 5             | 5                  | 2                                | 9                  | 2                    |
| Diethoxymethane                | 462-95-3     | Ether                  | Green            | 88                 | 6            | 5       | 4            | 4             | 5                             | 5                         | 4             | 3                  | 4                                | 8                  | 5                    |
| N-Ethylpyrrolidone             | 2687-91-4    | Dipolar aprotic        | Green            | 212                | 3            | 4       | 3            | 10            | 9                             | 6                         | 1             | 8                  | 9                                | 9                  | 6                    |
| Methyl formate                 | 107-31-3     | Ester                  | Green            | 33                 | 3            | 7       | 3            | 1             | 9                             | 9                         | 7             | 4                  | 3                                | 9                  | 0                    |
| Dimethoxymethane               | 109-87-5     | Ether                  | Green            | 42                 | 5            | 6       | 3            | 1             | 6                             | 6                         | 10            | 3                  | 3                                | 5                  | 2                    |
| Tetrahydrofurfuryl alcohol     | 97-99-4      | Alcohol                | Green            | 178                | 4            | 4       | 4            | 8             | 9                             | 6                         | 1             | 5                  | 9                                | 6                  | 3                    |

\*A red value in the number of data gaps column highlights those solvents with 4 or more data gaps. At least one piece of data is not available as part of this subsector. Values have been estimated where possible via calculation or comparison to structurally similar solvents.

Figure 7: Data chart for the 44 newly scored solvents, showing all category scores and the total number of data gaps for each solvent. Solvents are rank ordered by composite score within each colour designation.

## Section 5: Data Gap Analysis List.

The charts below details all data gaps within the dataset for the GSK Solvent Sustainability Guide and specifies how these gaps are filled for the purposes of reaching assessment endpoints.

| Solvent                        | Property               | Type of Gap<br>(default, nearest neighbour, chemical class, calculation) | Source or Reference for Approximation |
|--------------------------------|------------------------|--------------------------------------------------------------------------|---------------------------------------|
| Butylene carbonate             | Enthalpy of combustion | default                                                                  | N/A                                   |
| Dihydrolevoglucosenone         | Enthalpy of combustion | default                                                                  | N/A                                   |
| Diisopropyl adipate            | Enthalpy of combustion | default                                                                  | N/A                                   |
| Dimethyl adipate               | Enthalpy of combustion | default                                                                  | N/A                                   |
| Dimethyl isosorbide            | Enthalpy of combustion | default                                                                  | N/A                                   |
| 1,3-Dimethyl-2-imidazolidinone | Enthalpy of combustion | default                                                                  | N/A                                   |
| <i>N,N</i> -Dimethyldecanamide | Enthalpy of combustion | default                                                                  | N/A                                   |
| <i>N,N</i> -Dimethyloctanamide | Enthalpy of combustion | default                                                                  | N/A                                   |
| Dimethylpropylene urea         | Enthalpy of combustion | default                                                                  | N/A                                   |
| <i>N</i> -Ethylpyrrolidone     | Enthalpy of combustion | default                                                                  | N/A                                   |
| Perfluorocyclic ether          | Enthalpy of combustion | default                                                                  | N/A                                   |
| Perfluorocyclohexane           | Enthalpy of combustion | default                                                                  | N/A                                   |
| Perfluorohexane                | Enthalpy of combustion | default                                                                  | N/A                                   |
| Perfluorotoluene               | Enthalpy of combustion | default                                                                  | N/A                                   |
| Petroleum spirit               | Enthalpy of combustion | default                                                                  | N/A                                   |
| Trichloroacetonitrile          | Enthalpy of combustion | default                                                                  | N/A                                   |
| 1,2,3-Trimethoxypropane        | Enthalpy of combustion | default                                                                  | N/A                                   |
| Water                          | Enthalpy of combustion | default                                                                  | N/A                                   |
| 1,2,3-Trimethoxypropane        | Water solubility       | calculated                                                               | ACD prediction from SciFinder         |

**Table 12: Data Gaps within Incineration Category**

| <b>Solvent</b>                 | <b>Property</b>                  | <b>Type of Gap (default, nearest neighbour, chemical class, calculation)</b> | <b>Source or Reference for Approximation</b>                                                                            |
|--------------------------------|----------------------------------|------------------------------------------------------------------------------|-------------------------------------------------------------------------------------------------------------------------|
| 1,2,3-Trimethoxypropane        | Melting point                    | calculated                                                                   | <a href="http://www.qsardb.org/repository/predictor/10967/104">http://www.qsardb.org/repository/predictor/10967/104</a> |
| Butylene carbonate             | Presence of azeotrope with water | default                                                                      | N/A                                                                                                                     |
| Dihydrolevoglucosenone         | Presence of azeotrope with water | default                                                                      | N/A                                                                                                                     |
| Diisopropyl adipate            | Presence of azeotrope with water | default                                                                      | N/A                                                                                                                     |
| Dimethyl adipate               | Presence of azeotrope with water | default                                                                      | N/A                                                                                                                     |
| Dimethyl isosorbide            | Presence of azeotrope with water | default                                                                      | N/A                                                                                                                     |
| Dimethyl succinate             | Presence of azeotrope with water | default                                                                      | N/A                                                                                                                     |
| <i>N,N</i> -Dimethyldecanamide | Presence of azeotrope with water | default                                                                      | N/A                                                                                                                     |
| <i>N,N</i> -Dimethyloctanamide | Presence of azeotrope with water | default                                                                      | N/A                                                                                                                     |
| <i>N</i> -Ethylpyrrolidone     | Presence of azeotrope with water | default                                                                      | N/A                                                                                                                     |
| Glycerol triacetate            | Presence of azeotrope with water | default                                                                      | N/A                                                                                                                     |
| Methyl oleate                  | Presence of azeotrope with water | default                                                                      | N/A                                                                                                                     |
| Tetrahydrofurfuryl alcohol     | Presence of azeotrope with water | default                                                                      | N/A                                                                                                                     |
| Tetramethylurea                | Presence of azeotrope with water | default                                                                      | N/A                                                                                                                     |
| 1,2,3-Trimethoxypropane        | Presence of azeotrope with water | default                                                                      | N/A                                                                                                                     |

**Table 13: Data Gaps within Recycling Category**

| <b>Solvent</b>          | <b>Property</b> | <b>Type of Gap (default, nearest neighbour, chemical class, calculation)</b> | <b>Source or Reference for Approximation</b> |
|-------------------------|-----------------|------------------------------------------------------------------------------|----------------------------------------------|
| Diisopropyl adipate     | Vapour pressure | calculated                                                                   | ACD prediction from SciFinder                |
| 1,2,3-Trimethoxypropane | Vapour pressure | calculated                                                                   | ACD prediction from SciFinder                |

**Table 14: Data Gaps within VOC Emissions Category**

| <b>Solvent</b>          | <b>Property</b>       | <b>Type of Gap<br/>(default, nearest<br/>neighbour,<br/>chemical class,<br/>calculation)</b> | <b>Source or Reference for Approximation</b>                                                                                                                                                |
|-------------------------|-----------------------|----------------------------------------------------------------------------------------------|---------------------------------------------------------------------------------------------------------------------------------------------------------------------------------------------|
| Perfluorocyclic ether   | Aquatic toxicity      | calculated                                                                                   | QSAR                                                                                                                                                                                        |
| Perfluorocyclohexane    | Aquatic toxicity      | calculated                                                                                   | QSAR                                                                                                                                                                                        |
| Perfluorohexane         | Aquatic toxicity      | calculated                                                                                   | QSAR                                                                                                                                                                                        |
| Perfluorotoluene        | Aquatic toxicity      | calculated                                                                                   | QSAR                                                                                                                                                                                        |
| $\gamma$ -Valerolactone | Aquatic toxicity      | nearest neighbour                                                                            | Propylene carbonate                                                                                                                                                                         |
| Butylene carbonate      | Biodegradation        | calculated                                                                                   | EPISuite Biowin MITI Linear model                                                                                                                                                           |
| Diethyl succinate       | Biodegradation        | calculated                                                                                   | EPISuite Biowin MITI Linear model                                                                                                                                                           |
| Dimethyl isosorbide     | Biodegradation        | calculated                                                                                   | EPISuite Biowin MITI Linear model                                                                                                                                                           |
| Ethyl lactate           | Biodegradation        | calculated                                                                                   | EPISuite Biowin MITI Linear model                                                                                                                                                           |
| Ethyl propionate        | Biodegradation        | calculated                                                                                   | EPISuite Biowin MITI Linear model                                                                                                                                                           |
| Methylcyclohexane       | Biodegradation        | calculated                                                                                   | EPISuite Biowin MITI Linear model                                                                                                                                                           |
| Methylcyclopentane      | Biodegradation        | calculated                                                                                   | EPISuite Biowin MITI Linear model                                                                                                                                                           |
| Methyl propionate       | Biodegradation        | calculated                                                                                   | EPISuite Biowin MITI Linear model                                                                                                                                                           |
| 2-Pentanol              | Biodegradation        | calculated                                                                                   | EPISuite Biowin MITI Linear model                                                                                                                                                           |
| Perfluorocyclic ether   | Biodegradation        | chemical class                                                                               | <a href="http://www.epa.gov/hpv/pubs/summaries/perfluro/c13244rs.pdf">http://www.epa.gov/hpv/pubs/summaries/perfluro/c13244rs.pdf</a> suggests that perfluorocarbons are not biodegradable. |
| Perfluorocyclohexane    | Biodegradation        | chemical class                                                                               | <a href="http://www.epa.gov/hpv/pubs/summaries/perfluro/c13244rs.pdf">http://www.epa.gov/hpv/pubs/summaries/perfluro/c13244rs.pdf</a> suggests that perfluorocarbons are not biodegradable. |
| Perfluorohexane         | Biodegradation        | chemical class                                                                               | <a href="http://www.epa.gov/hpv/pubs/summaries/perfluro/c13244rs.pdf">http://www.epa.gov/hpv/pubs/summaries/perfluro/c13244rs.pdf</a> suggests that perfluorocarbons are not biodegradable. |
| Perfluorotoluene        | Biodegradation        | chemical class                                                                               | <a href="http://www.epa.gov/hpv/pubs/summaries/perfluro/c13244rs.pdf">http://www.epa.gov/hpv/pubs/summaries/perfluro/c13244rs.pdf</a> suggests that perfluorocarbons are not biodegradable. |
| Propanenitrile          | Biodegradation        | calculated                                                                                   | EPISuite Biowin MITI Linear model                                                                                                                                                           |
| Trichloroacetonitrile   | Biodegradation        | calculated                                                                                   | EPISuite Biowin MITI Linear model                                                                                                                                                           |
| Trifluorotoluene        | Biodegradation        | calculated                                                                                   | EPISuite Biowin MITI Linear model                                                                                                                                                           |
| $\gamma$ -Valerolactone | Biodegradation        | calculated                                                                                   | EPISuite Biowin MITI Linear model                                                                                                                                                           |
| Butylene carbonate      | Partition coefficient | calculated                                                                                   | <a href="http://www.epa.gov/hpvis/rbp/108-32-7_Propylene%20Carbonate_Web_April%202009.pdf">http://www.epa.gov/hpvis/rbp/108-32-7_Propylene%20Carbonate_Web_April%202009.pdf</a>             |
| Di(ethylene glycol)     | Partition coefficient | calculated                                                                                   | QSAR from ECHA registered chemicals database                                                                                                                                                |
| Dihydrolevoglucosenone  | Partition coefficient | calculated                                                                                   | clogP daylight                                                                                                                                                                              |
| Dimethoxymethane        | Partition coefficient | calculated                                                                                   | Chemspider EPISuite                                                                                                                                                                         |
| Dimethyl ether          | Partition coefficient | calculated                                                                                   | QSAR from ECHA registered chemicals database                                                                                                                                                |
| Dimethyl isosorbide     | Partition coefficient | calculated                                                                                   | <a href="http://www.perflavory.com/episys/ps1252931.html">http://www.perflavory.com/episys/ps1252931.html</a>                                                                               |
| Ethyl lactate           | Partition coefficient | calculated                                                                                   | <a href="http://chem.sis.nlm.nih.gov/chemidplus/rn/97-64-3">http://chem.sis.nlm.nih.gov/chemidplus/rn/97-64-3</a>                                                                           |
| Methyl lactate          | Partition coefficient | calculated                                                                                   | <a href="http://chem.sis.nlm.nih.gov/chemidplus/rn/547-64-8">http://chem.sis.nlm.nih.gov/chemidplus/rn/547-64-8</a>                                                                         |
| 2-Methyltetrahydrofuran | Partition coefficient | calculated                                                                                   | QSAR from ECHA registered chemicals database                                                                                                                                                |

|                         |                       |            |                                                                                                                                                                                                                     |
|-------------------------|-----------------------|------------|---------------------------------------------------------------------------------------------------------------------------------------------------------------------------------------------------------------------|
| <i>n</i> -Octyl acetate | Partition coefficient | calculated | <a href="http://webnet.oecd.org/CCRWEB/ChemicalDetails.aspx?ChemicalID=9d720ec0-d5c6-42de-9d25-fa1efd8ab761">http://webnet.oecd.org/CCRWEB/ChemicalDetails.aspx?ChemicalID=9d720ec0-d5c6-42de-9d25-fa1efd8ab761</a> |
| Perfluorocyclic ether   | Partition coefficient | calculated | <a href="http://chem.sis.nlm.nih.gov/chemidplus/rn/335-36-4">http://chem.sis.nlm.nih.gov/chemidplus/rn/335-36-4</a>                                                                                                 |
| Perfluorohexane         | Partition coefficient | calculated | <a href="http://chem.sis.nlm.nih.gov/chemidplus/rn/355-42-0">http://chem.sis.nlm.nih.gov/chemidplus/rn/355-42-0</a>                                                                                                 |
| Perfluorotoluene        | Partition coefficient | calculated | <a href="http://chem.sis.nlm.nih.gov/chemidplus/rn/434-64-0">http://chem.sis.nlm.nih.gov/chemidplus/rn/434-64-0</a>                                                                                                 |
| 1,3-Propanediol         | Partition coefficient | calculated | QSAR from ECHA registered chemicals database                                                                                                                                                                        |
| $\gamma$ -Valerolactone | Partition coefficient | calculated | Chemspider EPISuite                                                                                                                                                                                                 |

**Table 15: Data Gaps within Environment - Aquatic Impact Category**



| <b>Solvent</b>                    | <b>Property</b> | <b>Type of Gap<br/>(default, nearest<br/>neighbour,<br/>chemical class,<br/>calculation)</b> | <b>Source or Reference for<br/>Approximation</b> |
|-----------------------------------|-----------------|----------------------------------------------------------------------------------------------|--------------------------------------------------|
| <i>t</i> -Amyl alcohol            | odour threshold | nearest neighbour                                                                            | 2-Pentanol                                       |
| Bis(2-methoxyethyl) ether         | odour threshold | default                                                                                      | N/A                                              |
| 1,4-Butanediol                    | odour threshold | nearest neighbour                                                                            | 1,2-Propanediol                                  |
| Butylene carbonate                | odour threshold | default                                                                                      | N/A                                              |
| 2,4,6-Collidine                   | odour threshold | default                                                                                      | N/A                                              |
| Cyclopentanone                    | odour threshold | nearest neighbour                                                                            | Cyclohexanone                                    |
| <i>p</i> -Cymene                  | odour threshold | nearest neighbour                                                                            | Cumene                                           |
| <i>cis</i> -Decalin               | odour threshold | default                                                                                      | N/A                                              |
| Di(ethylene glycol)               | odour threshold | default                                                                                      | N/A                                              |
| Diethoxymethane                   | odour threshold | default                                                                                      | N/A                                              |
| Diethyl carbonate                 | odour threshold | default                                                                                      | N/A                                              |
| Diethyl succinate                 | odour threshold | default                                                                                      | N/A                                              |
| Diethylene glycol monobutyl ether | odour threshold | default                                                                                      | N/A                                              |
| Dihydrolevoglucosenone            | odour threshold | default                                                                                      | N/A                                              |
| Diisopropyl adipate               | odour threshold | default                                                                                      | N/A                                              |
| Dimethoxymethane                  | odour threshold | default                                                                                      | N/A                                              |
| Dimethyl adipate                  | odour threshold | default                                                                                      | N/A                                              |
| Dimethyl carbonate                | odour threshold | default                                                                                      | N/A                                              |
| Dimethyl isosorbide               | odour threshold | default                                                                                      | N/A                                              |
| Dimethyl succinate                | odour threshold | default                                                                                      | N/A                                              |
| Dimethyl sulphoxide               | odour threshold | default                                                                                      | N/A                                              |
| 1,3-Dimethyl-2-imidazolidinone    | odour threshold | default                                                                                      | N/A                                              |
| <i>N,N</i> -Dimethyldecanamide    | odour threshold | default                                                                                      | N/A                                              |
| <i>N,N</i> -Dimethyloctanamide    | odour threshold | default                                                                                      | N/A                                              |
| Dimethylpropylene urea            | odour threshold | default                                                                                      | N/A                                              |
| 1,3-Dioxolane                     | odour threshold | nearest neighbour                                                                            | 1,4-Dioxane                                      |
| Ethoxybenzene                     | odour threshold | default                                                                                      | N/A                                              |
| Ethyl propionate                  | odour threshold | nearest neighbour                                                                            | N/A                                              |
| Ethylene carbonate                | odour threshold | default                                                                                      | N/A                                              |
| <i>N</i> -Ethylpyrrolidone        | odour threshold | default                                                                                      | N/A                                              |
| Fluorobenzene                     | odour threshold | default                                                                                      | N/A                                              |
| Glycerol                          | odour threshold | default                                                                                      | N/A                                              |
| Glycerol triacetate               | odour threshold | default                                                                                      | N/A                                              |
| Isooctane                         | odour threshold | nearest neighbour                                                                            | Heptane                                          |
| 1,2-Isopropylidenglycerol         | odour threshold | default                                                                                      | N/A                                              |
| Lactic acid                       | odour threshold | default                                                                                      | N/A                                              |
| Methanesulfonic acid              | odour threshold | default                                                                                      | N/A                                              |

|                             |                 |                   |                                                                         |
|-----------------------------|-----------------|-------------------|-------------------------------------------------------------------------|
| Methyl lactate              | odour threshold | nearest neighbour | Ethyl lactate                                                           |
| Methyl oleate               | odour threshold | default           | N/A                                                                     |
| Methylcyclopentane          | odour threshold | nearest neighbour | Methylcyclohexane                                                       |
| <i>N</i> -Methylformamide   | odour threshold | default           | N/A                                                                     |
| 2-Methyltetrahydrofuran     | odour threshold | default           | N/A                                                                     |
| Perfluorocyclic ether       | odour threshold | default           | N/A                                                                     |
| Perfluorocyclohexane        | odour threshold | default           | N/A                                                                     |
| Perfluorohexane             | odour threshold | default           | N/A                                                                     |
| Perfluorotoluene            | odour threshold | default           | N/A                                                                     |
| 1,3-Propanediol             | odour threshold | nearest neighbour | 1,2-Propanediol                                                         |
| Propylene carbonate         | odour threshold | default           | N/A                                                                     |
| Sulfolane                   | odour threshold | default           | N/A                                                                     |
| Tetramethylurea             | odour threshold | default           | N/A                                                                     |
| Tri(ethylene glycol)        | odour threshold | default           | N/A                                                                     |
| Trichloroacetonitrile       | odour threshold | default           | N/A                                                                     |
| Trifluoroacetic acid        | odour threshold | default           | N/A                                                                     |
| 2,2,2-Trifluoroethanol      | odour threshold | default           | N/A                                                                     |
| 1,2,3-Trimethoxypropane     | odour threshold | default           | N/A                                                                     |
| Water                       | odour threshold | default           | N/A                                                                     |
| $\gamma$ -Valerolactone     | odour threshold | default           | N/A                                                                     |
| Amyl acetate                | POCP            | chemical class    | Acetates                                                                |
| <i>t</i> -Amyl methyl ether | POCP            | nearest neighbour | <i>t</i> -Butyl methyl ether, <i>t</i> -Butyl ethyl ether <sup>37</sup> |
| Anisole                     | POCP            | default           |                                                                         |
| Bis(2-methoxyethyl) ether   | POCP            | default           | N/A                                                                     |
| 1,4-Butanediol              | POCP            | default           | N/A                                                                     |
| Butylene carbonate          | POCP            | nearest neighbour | Dimethyl carbonate                                                      |
| Carbon tetrachloride        | POCP            | nearest neighbour | Chloroform                                                              |
| Chloroacetic acid           | POCP            | default           | N/A                                                                     |
| 2,4,6-Collidine             | POCP            | nearest neighbour | Pyridine                                                                |
| Cyclopentanone              | POCP            | nearest neighbour | Cyclohexanone                                                           |
| <i>p</i> -Cymene            | POCP            | nearest neighbour | Toluene, Cumene <sup>38</sup>                                           |
| Dibutyl ether               | POCP            | nearest neighbour | Diethyl ether                                                           |
| Diethoxymethane             | POCP            | nearest neighbour | Dimethoxymethane                                                        |
| Diethyl carbonate           | POCP            | nearest neighbour | Dimethyl carbonate                                                      |
| Diethyl succinate           | POCP            | chemical class    | Esters                                                                  |
| Dihydrolevoglucosenone      | POCP            | default           | N/A                                                                     |
| Diisopropyl adipate         | POCP            | chemical class    | Esters                                                                  |
| 1,2-Dimethoxyethane         | POCP            | nearest neighbour | Dimethoxymethane                                                        |
| Dimethyl acetamide          | POCP            | default           | N/A                                                                     |
| Dimethyl adipate            | POCP            | chemical class    | Esters                                                                  |
| Dimethyl isosorbide         | POCP            | default           | N/A                                                                     |

|                                |      |                   |                                                                                                                                                                      |
|--------------------------------|------|-------------------|----------------------------------------------------------------------------------------------------------------------------------------------------------------------|
| Dimethyl succinate             | POCP | chemical class    | Esters                                                                                                                                                               |
| Dimethyl sulphoxide            | POCP | default           | N/A                                                                                                                                                                  |
| 1,3-Dimethyl-2-imidazolidinone | POCP | default           | N/A                                                                                                                                                                  |
| <i>N,N</i> -Dimethylaniline    | POCP | default           | N/A                                                                                                                                                                  |
| <i>N,N</i> -Dimethyldecanamide | POCP | default           | N/A                                                                                                                                                                  |
| <i>N,N</i> -Dimethyloctanamide | POCP | default           | N/A                                                                                                                                                                  |
| Dimethylpropylene urea         | POCP | default           | N/A                                                                                                                                                                  |
| 1,4-Dioxane                    | POCP | nearest neighbour | 1,3-Dioxolane                                                                                                                                                        |
| Ethoxybenzene                  | POCP | nearest neighbour | Anisole                                                                                                                                                              |
| Ethyl formate                  | POCP | nearest neighbour | Methyl formate                                                                                                                                                       |
| Ethylene carbonate             | POCP | nearest neighbour | Dimethyl carbonate                                                                                                                                                   |
| 2-Ethylhexyl acetate           | POCP | chemical class    | Acetates                                                                                                                                                             |
| <i>N</i> -Ethylpyrrolidone     | POCP | nearest neighbour | <i>N</i> -Methylpyrrolidone                                                                                                                                          |
| Fluorobenzene                  | POCP | default           | N/A                                                                                                                                                                  |
| Formamide                      | POCP | default           | N/A                                                                                                                                                                  |
| Furfural                       | POCP | default           | N/A                                                                                                                                                                  |
| 1-Heptanol                     | POCP | nearest neighbour | 1-Pentanol                                                                                                                                                           |
| 1-Hexanol                      | POCP | nearest neighbour | 1-Pentanol                                                                                                                                                           |
| Isoamyl acetate                | POCP | chemical class    | Acetates                                                                                                                                                             |
| Isobutyl acetate               | POCP | chemical class    | Acetates                                                                                                                                                             |
| Isooctane                      | POCP | nearest neighbour | Heptane                                                                                                                                                              |
| 1,2-Isopropylidene glycerol    | POCP | default           | N/A                                                                                                                                                                  |
| Lactic acid                    | POCP | default           | N/A                                                                                                                                                                  |
| Methanesulfonic acid           | POCP | default           | N/A                                                                                                                                                                  |
| Methyl lactate                 | POCP | nearest neighbour | Ethyl lactate                                                                                                                                                        |
| Methyl oleate                  | POCP | chemical class    | Esters                                                                                                                                                               |
| Methyl propionate              | POCP | nearest neighbour | Ethyl propionate                                                                                                                                                     |
| <i>N</i> -Methylformamide      | POCP | nearest neighbour | <i>N,N</i> -Dimethylformamide                                                                                                                                        |
| 1-Octanol                      | POCP | nearest neighbour | 1-Pentanol                                                                                                                                                           |
| <i>n</i> -Octyl acetate        | POCP | chemical class    | Esters                                                                                                                                                               |
| 2-Pentanol                     | POCP | nearest neighbour | 2-Butanol                                                                                                                                                            |
| Perfluorocyclic ether          | POCP | chemical class    | perfluorinated solvents via<br><a href="http://www.epa.gov/hpv/pubs/summaries/perfluro/c13244rs.pdf">http://www.epa.gov/hpv/pubs/summaries/perfluro/c13244rs.pdf</a> |
| Perfluorocyclohexane           | POCP | chemical class    | perfluorinated solvents via<br><a href="http://www.epa.gov/hpv/pubs/summaries/perfluro/c13244rs.pdf">http://www.epa.gov/hpv/pubs/summaries/perfluro/c13244rs.pdf</a> |
| Perfluorohexane                | POCP | chemical class    | perfluorinated solvents via<br><a href="http://www.epa.gov/hpv/pubs/summaries/perfluro/c13244rs.pdf">http://www.epa.gov/hpv/pubs/summaries/perfluro/c13244rs.pdf</a> |
| Perfluorotoluene               | POCP | chemical class    | perfluorinated solvents via<br><a href="http://www.epa.gov/hpv/pubs/summaries/perfluro/c13244rs.pdf">http://www.epa.gov/hpv/pubs/summaries/perfluro/c13244rs.pdf</a> |
| Petroleum spirit               | POCP | nearest neighbour | Pentane                                                                                                                                                              |

|                            |      |                   |                     |
|----------------------------|------|-------------------|---------------------|
| Propylene carbonate        | POCP | nearest neighbour | Dimethyl carbonate  |
| Sulfolane                  | POCP | default           | N/A                 |
| Tetrahydrofurfuryl alcohol | POCP | nearest neighbour | Benzyl alcohol      |
| Tetramethylurea            | POCP | default           | N/A                 |
| Trichloroacetic acid       | POCP | default           | N/A                 |
| Trichloroacetonitrile      | POCP | default           | N/A                 |
| 1,2,4-Trichlorobenzene     | POCP | nearest neighbour | 1,2-Dichlorobenzene |
| Trifluoroacetic acid       | POCP | default           | N/A                 |
| 2,2,2-Trifluoroethanol     | POCP | default           | N/A                 |
| $\gamma$ -Valerolactone    | POCP | default           | N/A                 |
| Water                      | POCP |                   |                     |

**Table 16: Data Gaps within Environment - Air Impact Category**

| <b>Solvent</b>                 | <b>Property</b> | <b>Type of Gap<br/>(default, nearest<br/>neighbour,<br/>chemical class,<br/>calculation)</b> | <b>Source or Reference for Approximation</b>                           |
|--------------------------------|-----------------|----------------------------------------------------------------------------------------------|------------------------------------------------------------------------|
| Butylene carbonate             | OEL             | default                                                                                      | N/A                                                                    |
| Cyclopentyl methyl ether       | OEL             | default                                                                                      | N/A                                                                    |
| <i>p</i> -Cymene               | OEL             | default                                                                                      | N/A                                                                    |
| Dibutyl ether                  | OEL             | default                                                                                      | N/A                                                                    |
| Diethoxymethane                | OEL             | default                                                                                      | N/A                                                                    |
| Diethyl carbonate              | OEL             | default                                                                                      | N/A                                                                    |
| Diethyl succinate              | OEL             | default                                                                                      | N/A                                                                    |
| Dihydrolevoglucosenone         | OEL             | default                                                                                      | N/A                                                                    |
| Diisopropyl adipate            | OEL             | default                                                                                      | N/A                                                                    |
| 1,3-Dimethyl-2-imidazolidinone | OEL             | default                                                                                      | N/A                                                                    |
| Dimethyl isosorbide            | OEL             | default                                                                                      | N/A                                                                    |
| <i>N,N</i> -Dimethyldecanamide | OEL             | default                                                                                      | N/A                                                                    |
| <i>N,N</i> -Dimethyloctanamide | OEL             | default                                                                                      | N/A                                                                    |
| Dimethylpropylene urea         | OEL             | default                                                                                      | N/A                                                                    |
| Ethoxybenzene                  | OEL             | default                                                                                      | N/A                                                                    |
| Ethyl propionate               | OEL             | default                                                                                      | N/A                                                                    |
| Ethylene carbonate             | OEL             | default                                                                                      | N/A                                                                    |
| 2-Ethylhexyl acetate           | OEL             | default                                                                                      | N/A                                                                    |
| <i>N</i> -Ethylpyrrolidone     | OEL             | default                                                                                      | N/A                                                                    |
| Fluorobenzene                  | OEL             | default                                                                                      | N/A                                                                    |
| Glycerol diacetate             | OEL             | default                                                                                      | N/A                                                                    |
| Glycerol triacetate            | OEL             | default                                                                                      | N/A                                                                    |
| 1-Heptanol                     | OEL             | default                                                                                      | N/A                                                                    |
| 1,2-Isopropylidenglycerol      | OEL             | default                                                                                      | N/A                                                                    |
| Lactic acid                    | OEL             | default                                                                                      | N/A                                                                    |
| L-Limonene                     | OEL             | default                                                                                      | N/A                                                                    |
| Methyl lactate                 | OEL             | default                                                                                      | N/A                                                                    |
| Methyl propionate              | OEL             | default                                                                                      | N/A                                                                    |
| <i>N</i> -Methylformamide      | OEL             | default                                                                                      | H360 severe health risk corresponds to health hazard score of 1 of 10. |
| 2-Methyltetrahydrofuran        | OEL             | default                                                                                      | N/A                                                                    |
| <i>n</i> -Octyl acetate        | OEL             | default                                                                                      | N/A                                                                    |
| Perfluorocyclic ether          | OEL             | default                                                                                      | N/A                                                                    |
| Perfluorocyclohexane           | OEL             | default                                                                                      | N/A                                                                    |
| Perfluorohexane                | OEL             | default                                                                                      | N/A                                                                    |
| Perfluorotoluene               | OEL             | default                                                                                      | N/A                                                                    |
| 1,3-Propanediol                | OEL             | default                                                                                      | N/A                                                                    |
| Propylene carbonate            | OEL             | default                                                                                      | N/A                                                                    |

|                         |     |         |                                                                        |
|-------------------------|-----|---------|------------------------------------------------------------------------|
| Tetramethylurea         | OEL | default | H360 severe health risk corresponds to health hazard score of 1 of 10. |
| Trichloroacetonitrile   | OEL | default | N/A                                                                    |
| Trifluoroacetic acid    | OEL | default | N/A                                                                    |
| Trifluorotoluene        | OEL | default | N/A                                                                    |
| 1,2,3-Trimethoxypropane | OEL | default | N/A                                                                    |
| $\gamma$ -Valerolactone | OEL | default | N/A                                                                    |

**Table 17: Data Gaps within Exposure Potential Category**

| Solvent                        | Property                 | Type of Gap (default, nearest neighbour, chemical class, calculation) | Source or Reference for Approximation                        |
|--------------------------------|--------------------------|-----------------------------------------------------------------------|--------------------------------------------------------------|
| 2,4,6-Collidine                | Autoignition Temperature | nearest neighbour                                                     | Pyridine, Mesitylene <sup>35</sup>                           |
| Dimethyl isosorbide            | Autoignition Temperature | chemical class                                                        | Ethers                                                       |
| Perfluorocyclic ether          | Autoignition Temperature | chemical class                                                        | Halogenated                                                  |
| Perfluorocyclohexane           | Autoignition Temperature | chemical class                                                        | Halogenated                                                  |
| Perfluorohexane                | Autoignition Temperature | chemical class                                                        | Halogenated                                                  |
| Perfluorotoluene               | Autoignition Temperature | chemical class                                                        | Halogenated                                                  |
| Trichloroacetonitrile          | Autoignition Temperature | chemical class                                                        | Halogenated                                                  |
| Trifluoroacetic acid           | Autoignition Temperature | chemical class                                                        | Halogenated                                                  |
| 1,2,3-Trimethoxypropane        | Autoignition Temperature | chemical class                                                        | Glycol derivatives                                           |
| $\gamma$ -Valerolactone        | Autoignition Temperature | chemical class                                                        | Esters                                                       |
| Amyl acetate                   | Electrical conductivity  | chemical class                                                        | Esters                                                       |
| <i>t</i> -Amyl alcohol         | Electrical conductivity  | chemical class                                                        | Alcohols                                                     |
| <i>t</i> -Amyl methyl ether    | Electrical conductivity  | nearest neighbour                                                     | TBME                                                         |
| Bis(2-methoxyethyl) ether      | Electrical conductivity  | default                                                               | N/A                                                          |
| 1,4-Butanediol                 | Electrical conductivity  | chemical class                                                        | Alcohols                                                     |
| <i>t</i> -Butyl acetate        | Electrical conductivity  | chemical class                                                        | Esters                                                       |
| <i>t</i> -Butyl ethyl ether    | Electrical conductivity  | nearest neighbour                                                     | TBME                                                         |
| Butylene carbonate             | Electrical conductivity  | chemical class                                                        | Carbonates                                                   |
| 2,4,6-Collidine                | Electrical conductivity  | chemical class                                                        | Aromatics                                                    |
| Cumene                         | Electrical conductivity  | chemical class                                                        | Aromatics                                                    |
| Cyclopentanone                 | Electrical conductivity  | chemical class                                                        | Ketones                                                      |
| <i>p</i> -Cymene               | Electrical conductivity  | chemical class                                                        | Hydrocarbon                                                  |
| Dibutyl ether                  | Electrical conductivity  | nearest neighbour                                                     | Diethyl ether, Diisopropyl ether <sup>35</sup>               |
| 1,2-Dichlorobenzene            | Electrical conductivity  | default                                                               | N/A                                                          |
| Diethoxymethane                | Electrical conductivity  | nearest neighbour                                                     | Dimethoxymethane, Dimethoxyethane <sup>35</sup>              |
| Diethyl succinate              | Electrical conductivity  | chemical class                                                        | Esters                                                       |
| Dihydrolevoglucosenone         | Electrical conductivity  | chemical class                                                        | Ketones                                                      |
| Diisopropyl adipate            | Electrical conductivity  | chemical class                                                        | Esters                                                       |
| 1,2-Dimethoxyethane            | Electrical conductivity  | nearest neighbour                                                     | Dimethoxymethane                                             |
| Dimethyl adipate               | Electrical conductivity  | chemical class                                                        | Esters                                                       |
| Dimethyl ether                 | Electrical conductivity  | nearest neighbour                                                     | Diethyl ether, Diisopropyl ether <sup>35</sup>               |
| 1,3-Dimethyl-2-imidazolidinone | Electrical conductivity  | chemical class                                                        | Dipolar aprotics                                             |
| Dimethyl isosorbide            | Electrical conductivity  | nearest neighbour                                                     | CPME, THF                                                    |
| Dimethyl succinate             | Electrical conductivity  | chemical class                                                        | Esters                                                       |
| <i>N,N</i> -Dimethylaniline    | Electrical conductivity  | default                                                               | N/A                                                          |
| <i>N,N</i> -Dimethyldecanamide | Electrical conductivity  | chemical class                                                        | <i>N,N</i> -Dimethylformamide, <i>N,N</i> -Dimethylacetamide |
| <i>N,N</i> -Dimethyloctanamide | Electrical conductivity  | chemical class                                                        | <i>N,N</i> -Dimethylformamide, <i>N,N</i> -                  |

|                            |                         |                   |                                                         |
|----------------------------|-------------------------|-------------------|---------------------------------------------------------|
|                            |                         |                   | Dimethylacetamide                                       |
| Dimethylpropylene urea     | Electrical conductivity | chemical class    | Dipolar aprotics                                        |
| 1,3-Dioxolane              | Electrical conductivity | nearest neighbour | 1,4-Dioxane                                             |
| Ethyl lactate              | Electrical conductivity | chemical class    | Esters                                                  |
| Ethylene carbonate         | Electrical conductivity | chemical class    | Carbonates                                              |
| <i>N</i> -Ethylpyrrolidone | Electrical conductivity | nearest neighbour | <i>N</i> -Methylpyrrolidone                             |
| Fluorobenzene              | Electrical conductivity | nearest neighbour | Bromobenzene, Chlorobenzene, Nitrobenzene <sup>35</sup> |
| Glycerol triacetate        | Electrical conductivity | chemical class    | Alcohols                                                |
| 1-Heptanol                 | Electrical conductivity | chemical class    | Alcohols                                                |
| Isooctane                  | Electrical conductivity | chemical class    | Hydrocarbon                                             |
| 1,2-Isopropylidenglycerol  | Electrical conductivity | chemical class    | Alcohols                                                |
| Lactic acid                | Electrical conductivity | chemical class    | Acids                                                   |
| D-Limonene                 | Electrical conductivity | chemical class    | Hydrocarbon                                             |
| L-Limonene                 | Electrical conductivity | chemical class    | Hydrocarbon                                             |
| Mesitylene                 | Electrical conductivity | chemical class    | Hydrocarbon                                             |
| 2-Methoxyethanol           | Electrical conductivity | chemical class    | Alcohols                                                |
| Methyl lactate             | Electrical conductivity | chemical class    | Esters                                                  |
| Methyl propionate          | Electrical conductivity | chemical class    | Alcohols                                                |
| Methylcyclohexane          | Electrical conductivity | chemical class    | Hydrocarbon                                             |
| Methylcyclopentane         | Electrical conductivity | chemical class    | Hydrocarbon                                             |
| 2-Methylpentane            | Electrical conductivity | chemical class    | Hydrocarbon                                             |
| 2-Methyltetrahydrofuran    | Electrical conductivity | nearest neighbour | Tetrahydrofuran                                         |
| 2-Pentanol                 | Electrical conductivity | chemical class    | Alcohols                                                |
| Perfluorocyclic ether      | Electrical conductivity | nearest neighbour | Perfluorohexane                                         |
| Perfluorocyclohexane       | Electrical conductivity | nearest neighbour | Perfluorohexane                                         |
| Perfluorotoluene           | Electrical conductivity | nearest neighbour | Perfluorohexane                                         |
| Petroleum spirit           | Electrical conductivity | chemical class    | Hydrocarbon                                             |
| 1,3-Propanediol            | Electrical conductivity | chemical class    | Alcohols                                                |
| Propylene carbonate        | Electrical conductivity | chemical class    | Carbonates                                              |
| Tetrahydrofurfuryl alcohol | Electrical conductivity | chemical class    | Alcohols                                                |
| Tetramethylurea            | Electrical conductivity | chemical class    | Alcohols                                                |
| Trichloroacetonitrile      | Electrical conductivity | chemical class    | Dipolar aprotics                                        |
| 1,2,4-Trichlorobenzene     | Electrical conductivity | default           | N/A                                                     |
| Triethylamine              | Electrical conductivity | nearest neighbour | Trimethylamine                                          |
| Trifluoroacetic acid       | Electrical conductivity | chemical class    | Acids                                                   |
| 2,2,2-Trifluoroethanol     | Electrical conductivity | nearest neighbour | Pyridine                                                |
| 1,2,3-Trimethoxypropane    | Electrical conductivity | nearest neighbour | Ethylene glycol                                         |
| $\gamma$ -Valerolactone    | Electrical conductivity | chemical class    | Esters                                                  |
| Perfluorocyclohexane       | Flash point             | calculated        | J. Phys. Chem. Ref. Data, Vol. 33, No. 4, 2004, 1083    |

Table 18: Data Gaps within Flammability & Explosivity Category



| Solvent                 | Property               | Type of Gap (default, nearest neighbour, chemical class, calculation) | Source or Reference for Approximation |
|-------------------------|------------------------|-----------------------------------------------------------------------|---------------------------------------|
| 1,2,3-Trimethoxypropane | NFPA Reactivity Rating | default                                                               | N/A                                   |

Table 19: Data Gaps for Reactivity Category

- <sup>1</sup> P. G. Jessop, *Green Chem.*, 2001, **13**, 1391-1398.
- <sup>2</sup> P. G. Jessop, D. A. Jessop, D. Fu and L. Pham, *Green Chem.*, 2012, **14**, 1245-1259.
- <sup>3</sup> Y. Gu and F. Jérôme, *Chem. Soc. Rev.*, 2013, **42**, 9550-9570.
- <sup>4</sup> ACS GCI Pharmaceutical Roundtable - Demographic Survey for Solvent Selection Guide, 2013: <http://surveys.acs.org/se.ashx?s=04BD76CC0E5496A7>
- <sup>5</sup> D. Prat, A. Wells, J. Hayler, H. Sneddon, C. R. McElroy, S. Abou-Shehada and P. J. Dunn *Green Chem.*, 2016, **18**, 288 – 296 and D. Prat, A. Wells, J. Hayler, H. Sneddon, C. R. McElroy, S. Abou-Shehada and P. J. Dunn *Green Chem.*, 2015, **17**, 4848 – 4848.
- <sup>6</sup> J. H. Clark, D. J. Macquarrie and J. Sherwood, *Green Chem.*, 2012, **14**, 90-93.
- <sup>7</sup> A. Wolfson, A. Snezhko, T. Meyouhas and D. Tavor, *Green Chem. Lett. and Rev.*, 2012, **5**, 7-12.
- <sup>8</sup> A. E. Díaz-Álvarez, J. Francos, B. Lastra-Barreira, P. Crochet, and V. Cadierno, *Chem. Commun.*, 2011, **47**, 6208-6227.
- <sup>9</sup> J. Yang, J.-N. Tan, and Y. Gu, *Green Chem.*, 2012, **14**, 3304-3317.
- <sup>10</sup> M. Rose and R. Palkovits, *ChemSusChem*, 2012, **5**, 167 – 176.
- <sup>11</sup> D. M. Alonso, S. G. Wettstein and J. A. Dumesic, *Green Chem.*, 2013, **15**, 584–595; Z.-Q. Duan and F. Hu, *Green Chem.*, 2012, **14**, 1581–1583; L. Vaccaro, E. Ismalaj, G. Strappaveccia, E. Ballerini, O. Piermatti, D. Gelman, and F. Elisei, *ACS Sustainable Chem. Eng.*, 2014, **2**, 2461-2464.
- <sup>12</sup> A. Perosa and F. Zecchini, *Methods and Reagents for Green Chemistry: An Introduction*, J. Wiley and Sons, 2007. (<http://books.google.com/books?id=jtS9DH54vjUC>)
- <sup>13</sup> M. H. Tucker, R. Alamillo, A. J. Crisci, G. M. Gonzalez, S. L. Scott, and J. A. Dumesic, *ACS Sustainable Chem. Eng.* 2013, **1**, 554–560. <http://www.epa.gov/hpv/pubs/summaries/dioxlne/c12846.pdf> (accessed 22Oct2013)
- <sup>14</sup> [http://www.protocolodemontreal.org.br/eficiente/repositorio/Ciclo%20de%20Palestras/ciclo\\_de\\_palestras/845.pdf](http://www.protocolodemontreal.org.br/eficiente/repositorio/Ciclo%20de%20Palestras/ciclo_de_palestras/845.pdf) (accessed 30Sept2013)
- <sup>15</sup> N. W. Boaz and B. Venepalli, *Org. Proc. Res. Dev.*, 2001, **5**, 127-131.
- <sup>16</sup> M. Achmatowicz, O. R. Thiel, P. Wheeler, C. Bernard, J. Huang, R. D. Larsen, and M. M. Faul, *J. Org. Chem.*, 2009, **74**, 795-809.
- <sup>17</sup> M. T. Coleman, *Chemistry Today*, 2009, **27**, 43-45.
- <sup>18</sup> <http://echa.europa.eu/> (accessed Feb2016)
- <sup>19</sup> B. Schäffner, F. Schäffner, S. P. Verevkin, and A. Börner, *Chem. Rev.*, 2010, **110**, 4554-4581.
- <sup>20</sup> C. Beattie, M. North and P. Villuendas, *Molecules*, 2011, **16**, 3420-3432.
- <sup>21</sup> M. D. Gernon, M. Wu, T. Buszta, and P. Janney, *Green Chem.*, 1999, **1**, 127-140.
- <sup>22</sup> Several solvents (e.g. methyl formate) are included in solvent lists for evaluation by the ACS GCIPR (see Ref. 4) or IMI: CHEM21 (see Ref. 5). These solvents were added to the dataset in order to facilitate full comparison with our methods.
- <sup>23</sup> M. Sutter, L. Pehlivan, R. Lafon, Y. Raoul, E. Metay and M. Lemaire, *Green Chem.*, 2013, **15**, 3020-3026. <http://circagroup.com.au/cyrene/> (accessed Feb2016)
- <sup>24</sup> Such cases were determined by using SciFinder to search for instances of a given chemical classified with role of “solvent” in published reactions. Any literature sources returned were then evaluated by the authors to determine if they were relevant to this work.
- <sup>25</sup> M. M. Cecchini, C. Charnay, F. De Angelis, F. Lamaty, J. Martinez, and E. Colacino, *ChemSusChem*, 2014, **7**, 45-65.
- <sup>26</sup> The geometric mean scores for Flammability & Explosivity and Reactivity, are here normalised to a scale from 1.0 to 4.0, using the formula:
- $$Score = \left( \frac{Score_{calc} - Min\ Score}{Max\ Score - Min\ Score} \times 3 \right) + 1$$
- where the Flammability & Explosivity score has a minimum of 1.3 and a maximum of 4.0 and the reactivity score has a minimum of 1.7 and a maximum of 4.0.
- <sup>27</sup> <http://www.ilo.org/legacy/english/protection/safework/ghs/ghsfinal/ghsc14.pdf>
- <sup>28</sup> Sources used for regulatory data include internal GSK OEL values, threshold limit values (TLVs) from: American Conference of Governmental Industrial Hygienists (ACGIH), National Institute for Occupational Safety and Health (NIOSH), Occupational Safety and Health Administration (OSHA); time weighted average (TWA) values from: European Agency for Safety and Health at Work (EU-OSHA) Directive 2000/39/EC, EU-OSHA Directive 2006/15/EC, EU-OSHA Directive 2009/161/EU, EU-OSHA Directive 91/322/EEC, American Industrial Hygiene Association (AIHA) Workplace Environmental Exposure Levels (WEELs), ACGIH 8 hour values, United Kingdom - Workplace Exposure Limits (WELs); and German OEL values from the Technische Regel für Gefahrstoffe 900 (TRGS 900).
- <sup>29</sup> In two cases, *N*-methylformamide and tetramethyl urea, no formal guidance can be sourced on regulatory OEL values. However in both of these cases GHS hazard phrases indicate significant risk of reprotoxicity. In line with GSK’s general health risk guidelines, these two solvents have therefore been assigned a default OEL value of 0.1 ppm, rather than the standard 2.5 ppm default.
- <sup>30</sup> Sources utilised include: European Chemicals Agency (ECHA) Classification & Labeling (C&L) Inventory database (<http://echa.europa.eu/information-on-chemicals/cl-inventory-database>, ECHA Registered Substances Database (<http://echa.europa.eu/web/guest/information-on-chemicals/registered-substances>), and UK versions of MSDS from both Sigma Aldrich and Acros Organics websites, websites last accessed 13Jan2016.
- <sup>31</sup> In addition to the resources from ECHA and vendor MSDS as described previously, we also consulted the National Institute of Health (NIH) Toxnet Hazardous Substances Data Bank (HSDB): <http://toxnet.nlm.nih.gov/cgi-bin/sis/htmlgen?HSDB>.
- <sup>32</sup> <http://echa.europa.eu/regulations/reach/registration/information-requirements> and <http://eur-lex.europa.eu/LexUriServ/LexUriServ.do?uri=OJ:L:2007:136:0003:0280:EN:PDF>, last accessed 13Jan2016.

---

<sup>35</sup> As listed in ECHA Registered Substances Database (<http://echa.europa.eu/web/guest/information-on-chemicals/registered-substances>) or the 2007 OECD (Organisation for Economic Co-operation and Development) List of High Production Volume Chemicals ([http://www.oecd.org/officialdocuments/publicdisplaydocumentpdf/?cote=env/jm/mono\(2009\)40&doclanguage=en](http://www.oecd.org/officialdocuments/publicdisplaydocumentpdf/?cote=env/jm/mono(2009)40&doclanguage=en)).

<sup>36</sup> For perfluorocyclohexane, no flash point data can be sourced. For this data point, a method to calculate flash point from boiling point and enthalpy of vaporization (as described in L. Catoire, V. Naudet, *J. Phys. Chem. Ref. Data*, 2004, **33**, 1083-1110.) is utilised.

<sup>37</sup> In cases where multiple solvents could reasonably be considered to be the “nearest” neighbour to a given solvent, the data and/or scoring for the point of interest were examined for all neighbors, and the one which results in the more stringent evaluation was chosen.

<sup>38</sup> In cases where multiple solvents could reasonably be considered to be the “nearest” neighbour to a given solvent, the data and/or scoring for the point of interest were examined for all neighbors, and the one which results in the more stringent evaluation was chosen.
